# Supplementary material for: An exploratory spatial analysis of overweight and obesity among children and adolescents in Shandong, China
Source: PubMed Central journal article supplement — BMJ Open. 2019 Aug 22;9(8):e028152. doi: 10.1136/bmjopen-2018-028152 (PMC6707763; doi:10.1136/bmjopen-2018-028152), 2019-08-22
Supplement: bmjopen-2018-028152.draft_revisions.pdf [file bmjopen-2018-028152.draft_revisions.pdf]

# BMJ Open

BMJ Open is committed to open peer review. As part of this commitment we make the peer review history of every article we publish publicly available.

When an article is published we post the peer reviewers' comments and the authors' responses online. We also post the versions of the paper that were used during peer review. These are the versions that the peer review comments apply to.

The versions of the paper that follow are the versions that were submitted during the peer review process. They are not the versions of record or the final published versions. They should not be cited or distributed as the published version of this manuscript.

BMJ Open is an open access journal and the full, final, typeset and author-corrected version of record of the manuscript is available on our site with no access controls, subscription charges or pay-per-view fees (<http://bmjopen.bmj.com>).

If you have any questions on BMJ Open's open peer review process please email [info.bmjopen@bmj.com](mailto:info.bmjopen@bmj.com)

# BMJ Open

## An Exploratory Spatial Analysis of Overweight and Obesity among Children and Adolescents in Shandong, China

|                               |                                                                                                                                                                                                                                                                                                                                                                                                                                  |
|-------------------------------|----------------------------------------------------------------------------------------------------------------------------------------------------------------------------------------------------------------------------------------------------------------------------------------------------------------------------------------------------------------------------------------------------------------------------------|
| Journal:                      | <i>BMJ Open</i>                                                                                                                                                                                                                                                                                                                                                                                                                  |
| Manuscript ID                 | bmjopen-2018-028152                                                                                                                                                                                                                                                                                                                                                                                                              |
| Article Type:                 | Research                                                                                                                                                                                                                                                                                                                                                                                                                         |
| Date Submitted by the Author: | 26-Nov-2018                                                                                                                                                                                                                                                                                                                                                                                                                      |
| Complete List of Authors:     | Qin, Wenzhe; Shandong University, School of Public Health<br>Xu, Lingzhong; Shandong University,<br>Sun, Long; Shandong University, School of public health<br>Jiajia, Li; Shandong University, School of Public Health<br>Jiao, Zhang ; Shandong University, School of Public Health<br>Wang, Lu; Shandong University, School of Public Health<br>Shao, H; Department of Global Health Management and Policy, Tulane University |
| Keywords:                     | Overweight, Obesity, Child and adolescent, Spatial analysis, Geographic information systems                                                                                                                                                                                                                                                                                                                                      |
|                               |                                                                                                                                                                                                                                                                                                                                                                                                                                  |

SCHOLARONE™  
Manuscripts

## Title Page

An Exploratory Spatial Analysis of Overweight and Obesity among Children and  
Adolescents in Shandong, China

Wenzhe Qin<sup>a</sup>; Lingzhong Xu<sup>a</sup>; Long Sun<sup>a</sup>; Jiajia Li<sup>a</sup>; Jiao Zhang<sup>a</sup>; Lu Wang<sup>a</sup>; Hui Shao<sup>b</sup>

a. Department of Social Medicine and Health Service Management, School of Public Health, Shandong University, Jinan, Shandong, PR China

b. Department of Global Health Systems and Development School of Public Health and Tropical Medicine, Tulane University, New Orleans, LA, United States

**Corresponding author:** Lingzhong Xu, Professor

Department of Social Medicine and Health Management, School of Public Health, NHC Key Laboratory of Health Economics and Policy Research, Shandong University, Wenhuxi Road44#, Jinan, Shandong, 250012, China.

Tel and fax: +86-0531-88382648. Email: [lzxu@sdu.edu.cn](mailto:lzxu@sdu.edu.cn)

Word count: 2746

## An Exploratory Spatial Analysis of Overweight and Obesity among Children and Adolescents in Shandong, China

### Abstract

**Objective:** Identifying the spatial patterns of childhood overweight/obesity can help to guide resource allocation for preventive intervention in China. The aim of this study is to estimate rates of child overweight/obesity across counties within Shandong Province, using geographic techniques to identify sex-specific spatial patterns of childhood overweight/obesity as well as the presence of spatial clusters.

**Design:** Cross-sectional study.

**Setting:** Shandong Province in China.

**Participants and Methods:** 6,216,076 aged 7–18 years children and adolescents from the Children and Adolescent Physical Examination Database of Shandong Province were used in this study. Spatial patterns of sex-specific prevalence of childhood overweight and obesity were mapped. Global autocorrelation statistic (Moran's I) and the Local Indicator of Spatial Association (LISA) were applied to assess the degree of spatial autocorrelation,

**Results:** The overall prevalence of childhood overweight and obesity in Shandong province were 15.05% and 9.23% respectively. Maps of sex-specific prevalence of overweight/obesity demonstrate a marked geographical variation of children overweight/obesity in different regions. Prevalence of childhood overweight/obesity had a significant positive spatial autocorrelation among both boys and girls. LISA analysis identified significant clusters (or 'hot spots') of childhood overweight/obesity in the eastern coastal region, central region and southwestern region.

**Conclusions:** The prevalence of childhood overweight/obesity is highly spatially clustered. Geographically focused appropriate intervention should be introduced in currently childhood obesity prevention and control strategy.

**Keywords:** Overweight; Obesity; Child and adolescent; Spatial analysis; Geographic information systems

### Strengths and limitations of this study

- This study is a census of children and adolescents aged 7-18 years old in publicly maintained schools in Shandong Province with a large sample size.
- Geographic techniques to identify sex-specific spatial patterns of childhood overweight/obesity as well as the presence of spatial clusters.
- The results are important for understanding the role that place might play in the health status and suggesting the importance of improving interventions and health-related policies that are thus far mainly based on assumptions of spatial homogeneity.
- The absence of detailed information at the individual level limited research on the determinants of overweight/obesity on targeted clustered areas.
- As a cross-sectional study, the temporal and spatial trends of overweight/obesity cannot be verified.

## Introduction

Childhood obesity is one of the most serious public health challenges in the 21st century.<sup>1</sup> The prevalence of overweight and obesity among children and adolescent was rising rapidly in many developed countries and is affecting many low-and middle-income countries.<sup>2-6</sup> With rapid economic development over the past decades, China has also witnessed an increase in the prevalence of childhood obesity.<sup>7,8</sup> In 2010, the prevalence of overweight and obese among Chinese school-aged children were estimated to be 9.9% and 5.1% respectively, representing 30.43 million individuals.<sup>9</sup> A recent study showed that the detection rate of obesity among children and adolescents in China has increased by around 60 times from 1985 to 2014.<sup>10</sup>

Overweight and obesity in early life can lead to a serious health and economic burden.<sup>11</sup> Overweight and obese children are more likely to stay obese into adulthood, and develop noncommunicable diseases (NCDs) like diabetes and cardiovascular diseases at a younger age.<sup>12-14</sup> What's more, childhood obesity is associated with a higher chance of premature death and disability in adulthood.<sup>15</sup>

1  
2  
3  
4 Given its high prevalence and severe impact on health outcomes, researchers had  
5 poured attention into the modifiable determinants of childhood obesity. Several studies  
6 in China have found that sociodemographic factors and behavioral factors (e.g., dietary  
7 intake, fast eating speed, physical inactivity) contribute to the risk of children and  
8 adolescents overweight or obese.<sup>16-18</sup> In addition, few studies also identified geographic  
9 location as an important risk factor for childhood obesity. The current literatures in  
10 China mostly focused on the comparison of childhood overweight/obesity across  
11 different regions, categorized by different socioeconomic status (SES).<sup>8,19</sup> However,  
12 the geographical relevance between adjacent regions, especially in terms of lifestyle  
13 and social factors, were often neglected in those studies. Considering the fact that the  
14 prevalence of overweight/obesity at one health region are likely to be correlated with  
15 prevalence in nearby regions, ignoring the clustering effect could potentially lead to  
16 biased estimation.<sup>20</sup> In addition, most of the analysis were conducted at a provincial/city  
17 level, making it difficult to infer implementation of local policies/ decisions of obesity  
18 prevention targeting smaller areas (i.e., counties).

19  
20  
21  
22  
23  
24  
25  
26  
27  
28  
29  
30  
31  
32  
33  
34  
35 Shandong Province is an important littoral province in East China with a population of  
36 99.46 million in 2016, and covers an area of 156,700 square kilometers. It includes 140  
37 counties belonging to 17 administration regions (Figure 1). The prevalence of childhood  
38 obesity in Shandong Province in 2010 reached 15.8 and 7.1 % among boys and girls,  
39 respectively, which has caught up with developed countries.<sup>21</sup> In addition, the report of  
40 Children and Adolescent Physical Examination in Shandong province in 2015 showed  
41 that the overall overweight and obesity rates of children and adolescent were 30.8%  
42 and 12.8%, respectively, and the childhood overweight/obesity rates grew rapidly.<sup>22</sup>

43  
44  
45  
46  
47  
48  
49  
50  
51  
52 The aim of this study is to estimate rates of childhood overweight/obesity at the county  
53 level and apply geographic techniques to examine the spatial patterns of childhood  
54 overweight/obesity, in particular to identify spatial cluster of areas with higher rates of  
55 childhood overweight/obesity.

## Methods

### Data sources and study design

Schoolchildren aged 7-18 years old were identified from the Children and Adolescent Physical Examination Database of Shandong Province. This database contains 7-18 years old students from all publicly primary and secondary schools and vocational schools. Children and Adolescent Physical Examination is organized by Health and Family Planning Commission of Shandong Province, and conducted by medical staffs from 1,373 medical institutions in the whole province. The examination rate was 93.96%, and data reporting rate was 100%. We extracted individual information of schoolchildren and adolescent, including codes of administrative divisions, age, sex, and measure of overweight and obesity. Body mass index (BMI) was calculated (Weight in kilograms divided by height in meters squared:  $\text{kg/m}^2$ ). Childhood overweight and obesity were defined according to the classification reference in different age and gender of the Working Group for Obesity in China (WGO), the cut-off points of which are 85th and 95th percentiles of BMI, respectively (Overweight:  $85\text{th percentile} \leq \text{BMI} < 95\text{th percentile}$ ; Obesity:  $95\text{th percentile} \leq \text{BMI}$ ).<sup>23</sup>

Using demographic data from the 2010 census as the standard population, we estimated age-standardized rates of overweight/obesity for schoolchildren and adolescent aged 7-18 years older at county level. The age-standardized rate is a value that represents the ratio of observed incidence of disease to expected incidence of disease, whereas a value of zero indicates an area with no observed overweight and obese cases.

This study included 140 counties (city districts, county-level cities, and counties, often referred to here as “counties”) of Shandong Province as spatial units. After data cleaning, 6,216,076 qualified schoolchildren (3,072,876 boys and 3,143,200 girls) aged 7-18 years were finally included for analysis. All children voluntarily joined this study and provided written informed consent. The geography files were provided by National

1  
2  
3  
4 Administration of Surveying, Mapping and Geoinformation of China (NASG), the  
5 administrative organization in charge of surveying and mapping undertaking across  
6  
7 China.  
8  
9

### 10 11 **Statistical analysis**

12  
13 A two-part analysis was conducted: firstly, the spatial distribution of age-standardized  
14 overweight/obesity rates was mapped for boys and girls. Following this, the second part  
15 focused on two aspects of the spatial clustering: the overall 'global' spatial clustering  
16 in the prevalence of overweight/obesity and the 'local' patterns of overweight/obesity.  
17 Global Moran's *I* statistic is a measure of global spatial autocorrelation, a value  
18 representing the similarity in overweight/obesity rates between neighboring regions.<sup>24</sup>  
19 The Moran's *I* statistic ranges from +1 (for positive spatial autocorrelation where high  
20 values are proximal to other high values or low values adjacent to low values, i.e.,  
21 clustering) to -1 (for negative autocorrelation where high values tend to be near low  
22 values, i.e., dispersion). A statistically significant ( $Z$  score  $\geq 1.96$ ,  $P$  value  $< 0.05$ )  
23 estimate of Moran's *I* indicates that neighboring counties have a similar prevalence rate  
24 of overweight/obesity and the cases are likely to cluster at county level. Nonsignificant  
25 values indicate no spatial autocorrelation or that the data are randomly distributed  
26 within the study's geographical boundaries. In the present analysis, neighbors were  
27 defined using rooks case adjacency, which considers that all regions with common  
28 borders are neighbors.  
29  
30  
31  
32  
33  
34  
35  
36  
37  
38  
39  
40  
41  
42  
43  
44  
45

46 Moran's *I* statistic is a global test that does not identify where the clusters are located  
47 or what type of spatial autocorrelation is occurring (e.g. high-high cluster or low-low  
48 cluster etc.). To evaluate the existence of local clusters, it is necessary to use local  
49 statistics. The local indicator of spatial autocorrelation (LISA) was therefore applied as  
50 an indicator of local spatial association.<sup>20</sup> The local spatial autocorrelation decomposes  
51 the global measurement into the contributions for each geographic region, detecting  
52 homogeneity or heterogeneity in values around a given observation or used as  
53  
54  
55  
56  
57  
58  
59  
60



1  
2  
3  
4  
5  
6  
7  
8  
9  
10  
11  
12  
13  
14  
15  
16  
17  
18  
19  
20  
21  
22  
23  
24  
25  
26  
27  
28  
29  
30  
31  
32  
33  
34  
35  
36  
37  
38  
39  
40  
41  
42  
43  
44  
45  
46  
47  
48  
49  
50  
51  
52  
53  
54  
55  
56  
57  
58  
59  
60

diagnostics for outliers in global patterns. The LISA measures whether, for each health region, the standardized rate of overweight/obesity is closer to the values of its neighbors'. Inverse distance weighting squared is again used to conceptualize the spatial relationships. To ensure excellent statistical power and consider the computation times, 999 Monte Carlo replications were set, and clusters with statistical significance of  $P < 0.05$  were reported.

Cluster maps were created using the results of statistical testing to illustrate the local spatial patterns of significant positive and/or significant negative local spatial autocorrelation. The local spatial autocorrelation analysis results in five categories of health regions: (i) 'high-high' indicates clustering of high values of age-standardized overweight/obesity rates (positive LISA value), (ii) 'low-high' indicates that low values are adjacent to high values of age-standardized overweight/obesity rates (negative LISA value), (iii) 'low-low' indicates clustering of low values of age-standardized overweight/obesity rates (positive LISA value), (iv) 'high-low' indicates that high values are adjacent to low values of age-standardized overweight/obesity rates (negative LISA value), and (v) 'not significant' indicates that there is no spatial autocorrelation. All analyses were conducted using GeoDA<sup>25</sup> and ArcGis 10.3.

## Results

In Shandong province, the overall age-standardized rate of overweight and obesity were 15.05% and 9.23% respectively, which were higher than the national average rates of 5.45% and 2.83%. Also, the rate of overweight was 17.40% for boys and 12.73% for girls; the rate of obesity was 10.49% for boys and 7.97% for girls. The age-standardized rate of overweight and obesity in county level were higher in boys than girls ( $\chi^2 = 30.44$ ,  $P < 0.001$ ).

Age-standardized rates of overweight differed substantially across health regions ranging from 9.3% in Qihe, Dezhou to 24.94% in Penglai, Yantai for boys and from

8.19% in Linshu, Linyi to 19.15% in Longkou, Yantai for girls. Obesity rates varied substantially across health regions: from 3.59% in Changle, Weifang to 20.26% in Central District in Jining for boys and from 3.45% in Zhanhua, Liaocheng to 13.5% in Central District in Jining for girls. Age-standardized rates were also mapped by gender at county level, and then classified by the rates (Figure 2 and Figure 3).

Based on the aforementioned, there was a marked geographical variation of children overweight/obesity in different regions indicating potential presence of spatial clusters or spatial heterogeneity. The Moran's I statistic was applied to test the overall spatial clustering. The results showed that there are significant positive spatial autocorrelations in the data. In particular, the Moran's I statistic of age-standardized overweight rates was 0.3736 (p-value=0.001) for boys and 0.3370 for girls (p-value=0.001). In addition, the Moran's I statistic of age-standardized obesity rates was 0.2312 (p-value=0.001) for boys and 0.1575 (p-value=0.006) for girls. The level of spatial autocorrelation across health regions for age-standardized overweight/obesity rates were slightly higher in boys than girls. For both sexes, the Moran's I statistic and corresponding p-values all suggest non-randomness in the overall spatial pattern of the age-standardized rates of overweight and obesity in Shandong province. Table 1 illustrates spatial correlation statistics and corresponding p-values as estimated by the Moran's I statistic.

Table 1 Spatial autocorrelation of age-standardized overweight/obesity rates in Shandong Province

|            | Moran's I | Z value | P value |
|------------|-----------|---------|---------|
| Overweight |           |         |         |
| Boys       | 0.3736    | 7.1726  | 0.001   |
| Girls      | 0.3370    | 6.1104  | 0.001   |
| Both sexes | 0.2704    | 5.1601  | 0.001   |
| Obesity    |           |         |         |
| Boys       | 0.2312    | 4.4350  | 0.001   |
| Girls      | 0.1575    | 3.0727  | 0.006   |
| Both sexes | 0.1130    | 2.2082  | 0.014   |

1  
2  
3  
4 We applied LISA to explore more information on the type and location of clustering.  
5  
6 County-level LISA significant clusters were observed for both overweight and obesity  
7  
8 (Fig.4 and Fig.5). For overweight boys, two larger hot spot (HH) was detected in the  
9  
10 most counties of Yantai in eastern coastal region and Jining in southwest, and one  
11  
12 smaller hot spot (HH) was found in Jinan in the central province. Two large cool spots  
13  
14 (LL) were observed in the eastern and northwestern regions of Shandong province, and  
15  
16 one smaller LL was found in a county in southwest. For the girls, the hot spot was  
17  
18 comprised of the most counties in Yantai and two districts in Jinan and two counties in  
19  
20 Jining. Two large cool spots were detected in the eastern regions (Fig.4). However, the  
21  
22 pattern of clusters for obesity was different compared to that of overweight (Fig.5). For  
23  
24 boys, the hot spot mainly distributed in the central region, and a small hot spot was  
25  
26 detected in Qingdao in eastern coastal region. For girls, three hot spots were detected  
27  
28 in Weihai in eastern coastal region, and in Jinan and Zibo in central region, and in Jining  
29  
30 in southwest. In addition, several counties showed a dispersed pattern of cluster (HL or  
31  
32 LH) as displayed in Fig. 4 and Fig.5.  
33  
34  
35

## 36 **Discussions**

37  
38 The present study aimed to estimate rates of overweight and obesity at the county level  
39  
40 and apply geographical techniques to investigate the spatial variation of these rates  
41  
42 across the province. The results illustrate the marked variability of overweight/obesity  
43  
44 prevalence in Shandong province at the gender and health region level. The present  
45  
46 study has indicated that the age-standardized rate of both overweight and obesity among  
47  
48 boys was higher compared to girls. In addition to confirming the prevalence of  
49  
50 overweight and obesity, our spatial analysis showed the presence of spatial  
51  
52 heterogeneity using a significant positive spatial autocorrelation identified by Moran's  
53  
54 I statistic for both boys and girls as well as the significant local clusters identified by  
55  
56 LISA across the province.  
57  
58  
59  
60

1  
2  
3  
4 The difference in overweight/obesity between boys and girls is consistent with results  
5 from previous studies in Shandong and throughout China.<sup>26,27</sup> Differences in age  
6 structure cannot explain this finding, as data have been age-standardized. Instead, in  
7 addition to the possible biologic/genetic factors, the difference may be related to the  
8 fact that girls are generally more concerned about their body shape compared to boys.  
9 A study reported that consumption of foods and beverages outside three main meals  
10 and potato chips were more popular in boys than in girls.<sup>28</sup>  
11  
12  
13  
14  
15  
16  
17  
18

19 The global spatial autocorrelation demonstrates that there is significant positive spatial  
20 autocorrelation in the data, which showed higher levels of correlation in similar  
21 overweight/obesity rates between neighboring counties in the whole provincial. The  
22 spatial patterns of overweight/obesity might be explained by the cluster of different  
23 influenced factors, such as socioeconomic status (SES) as well as living environments,  
24 nutritional habits and lifestyle characteristics.<sup>29-31</sup>  
25  
26  
27  
28  
29  
30  
31  
32

33 The LISA found also that the hot spots (HH) were detected in Yantai of eastern coastal  
34 region, Jinan in the central region and Jining in the southwestern inland region among  
35 both boys and girls. Again, the cold spots (LL) and other dispersed patterns of cluster  
36 (HL or LH) were observed. Some potential explanations for the different type of  
37 clusters are as follows. First, the regional SES is the most important factor responsible  
38 for the geographic differences in the prevalence of childhood obesity. Some previous  
39 studies had confirmed that the regional SES affected to the distribution of  
40 overweight/obesity positively in China, in other words, high SES youths are more likely  
41 to be overweight/obesity than other lower SES counterparts.<sup>32</sup> The evidence provided  
42 by research indicated that overweight/obesity prevalence was greater and increased  
43 more quickly in the coastal counterparts.<sup>8</sup> Eastern coastal region has high SES with  
44 more developed economy, the living standards, nutritional conditions and public health  
45 are better than other SES districts. Secondly, with the fast-growing Chinese economy,  
46 the rapid urbanization has narrowed the disparity between coastal and inland  
47  
48  
49  
50  
51  
52  
53  
54  
55  
56  
57  
58  
59  
60

1  
2  
3  
4 counterparts and became a potential contributor that cannot be ignored.<sup>33,34</sup> That is the  
5  
6 reason why the hot spot of overweight and obesity for children also occurred in inland  
7  
8 region.  
9

10  
11 In addition to the aforementioned factors, the change in the dietary habit and duration  
12  
13 of physical activity accelerated the formation of ‘obesogenic environment’.<sup>35</sup> The  
14  
15 traditional Chinese diet is shifting toward a diet with high fat, high energy density and  
16  
17 low dietary fiber, changes which have resulted in rapid increases in the prevalence of  
18  
19 overweight and obesity and dietary-related chronic noncommunicable diseases.<sup>36</sup> With  
20  
21 the increased availability and consumption of sugared products, such as candy, soft  
22  
23 drinks and snacks, proliferation of fast food restaurants, this environmental shift is  
24  
25 particularly striking in China.<sup>8,32</sup> Moreover, the popularity of smartphones and  
26  
27 computer games brought the abundance of enticement that lead to reduced physical  
28  
29 activity. Television viewing or surf the Internet besides reducing physical activity also  
30  
31 leads to increased consumption of energy-rich foods through incessant commercial  
32  
33 advertisement.<sup>37</sup> These factors lead to a rapid increase in the prevalence of overweight  
34  
35 and obesity among children and adolescent.  
36  
37

38  
39 The strength of this study is that the database comes from the Children and Adolescent  
40  
41 Physical Examination Database of Shandong Province with a large sample size in  
42  
43 Shandong Province, China. Examination survey provided direct measurements of  
44  
45 weight and height, and avoided bias in self-reported data. The study detected a global  
46  
47 spatial autocorrelation across whole provincial regions, and hot spots of  
48  
49 overweight/obesity locally using spatial analysis. The results are important for  
50  
51 understanding the role that place might play in the health status and suggesting the  
52  
53 importance of improving interventions and health-related policies that are thus far  
54  
55 mainly based on assumptions of spatial homogeneity.<sup>38,39</sup> In addition, the findings  
56  
57 verified the effectiveness of spatial data analysis methods and in particular the helpful  
58  
59 means of cluster analysis for public health professionals and policy makers.  
60

1  
2  
3  
4  
5  
6  
7  
8  
9  
10  
11  
12  
13  
14  
15  
16  
17  
18  
19  
20  
21  
22  
23  
24  
25  
26  
27  
28  
29  
30  
31  
32  
33  
34  
35  
36  
37  
38  
39  
40  
41  
42  
43  
44  
45  
46  
47  
48  
49  
50  
51  
52  
53  
54  
55  
56  
57  
58  
59  
60

This study has several limitations. First, the absence of detailed information at the individual level limited research on the determinants of overweight/obesity on targeted clustered areas. Second, the study may also be affected by the modifiable areal unit problem. The spatial scale used is not unique and typically arbitrary and modifiable, the spatial patterns of overweight/obesity identified may change depending on different scales. In addition, we only analyzed the data for one year, due to data availability, the temporal and spatial trends of overweight/obesity cannot be verified.

## Conclusions

A high prevalence of childhood overweight/obesity was observed in Shandong Province, one of the populous provinces in China. There was geographical variation in childhood overweight and obesity, along with a tendency for regions to cluster based on the incidence of overweight and obesity. The present study validated and strengthened the sex-specific regional differences in the prevalence of childhood overweight/obesity, which previous studies had identified. In addition, the spatial clusters provide valuable information on the identification of local geographical variation and elevated risk of overweight/obesity in Shandong province. Therefore, prevention and health promotion interventions as well as effective allocation of resources and services should be implemented based on regional and population specific demands.

## Acknowledgment

We would like to thank Center for Health Economics Experiment and Public Policy; NHC Key Laboratory of Health Economics and Policy Research, Shandong University for the supports.

## Reference

- 1 WHO. Childhood overweight and obesity 2018. Available from: <http://www.who.int/dietphysicalactivity/childhood/en/>.
- 2 Ogden CL, Carroll MD, Kit BK, Flegal KM. Prevalence of obesity and trends in body mass index

- 1  
2  
3 among US children and adolescents, 1999-2010. *Jama*. 2012;307(5):483-90.  
4 <http://dx.doi.org/10.1001/jama.2012.40>
- 5  
6 3 Ogden CL, Carroll MD, Kit BK, Flegal KM. Prevalence of Childhood and Adult Obesity in the  
7 United States, 2011-2012. *Jama*. 2014;311(8):806. <http://dx.doi.org/10.1001/jama.2014.732>
- 8  
9 4 Stamatakis E, Wardle J, Cole TJ. Childhood obesity and overweight prevalence trends in  
10 England: evidence for growing socioeconomic disparities. *Int J Obes*. 2010;34(1):41-7.  
11 <http://dx.doi.org/10.1038/ijo.2009.217>
- 12  
13 5 Abarca-Gómez L, Abdeen Z A, Hamid Z A, et al. Worldwide trends in body-mass index,  
14 underweight, overweight, and obesity from 1975 to 2016: a pooled analysis of 2416 population-based  
15 measurement studies in 128·9 million children, adolescents, and adults. *The Lancet*, 2017, 390(10113):  
16 2627-2642. [https://doi.org/10.1016/S0140-6736\(17\)32129-3](https://doi.org/10.1016/S0140-6736(17)32129-3)
- 17  
18 6 Cheng TO. Obesity in Chinese children. *J R Soc Med*. 2004;97(5):254.  
19 <http://dx.doi.org/10.1177/014107680409700519>
- 20  
21 7 Ji CY. The prevalence of childhood overweight/obesity and the epidemic changes in 1985-2000  
22 for Chinese school-age children and adolescents. *Obes Rev*. 2010;9(s1):78-81.  
23 <http://dx.doi.org/10.1111/j.1467-789X.2007.00443.x>
- 24  
25 8 Ji CY, Cheng TO. Epidemic increase in overweight and obesity in Chinese children from 1985 to  
26 2005. *Int J Cardiol*. 2009;132(1):1-10. <http://dx.doi.org/10.1016/j.ijcard.2008.07.003>
- 27  
28 9 JI C Y, CHEN T J, Working Group on Obesity in China (WGOC). Empirical changes in the  
29 prevalence of overweight and obesity among Chinese students from 1985 to 2010 and corresponding  
30 preventive strategies. *Biomed Environ Sci*, 2013, 26(1): 1-12.  
31 <https://doi.org/10.3967/0895-3988.2013.01.001>
- 32  
33 10 Wang S, Dong Y H, Wang Z H, et al. Trends in overweight and obesity among Chinese children of  
34 7-18 years old during 1985-2014. *Zhonghua yu fang yi xue za zhi* [Chinese journal of preventive  
35 medicine], 2017, 51(4): 300-305.( Article in Chinese)
- 36  
37 11 Must A, Strauss RS. Risks and consequences of childhood and adolescent obesity. *Int J Obes (Lond)*.  
38 1999;23(2):S2. <https://doi.org/10.1038/sj.ijo.0800852>
- 39  
40 12 Wang Y, Lobstein T. Worldwide trends in childhood overweight and obesity. *Int J Pediatr Obes*.  
41 2006;1(1):11-25. <https://doi.org/10.1080/17477160600586747>
- 42  
43 13 Kelly AS, Barlow SE, Rao G, Inge TH, Hayman LL, Steinberger J, et al. Severe obesity in  
44 children and adolescents: identification, associated health risks, and treatment approaches: a scientific  
45 statement from the American Heart Association. *Circulation*. 2013;128:1689-712.  
46 <https://doi.org/10.1161/CIR.0b013e3182a5cfb3>
- 47  
48 14 Bridger T. Childhood obesity and cardiovascular disease. *Paediatr Child Health*. 2009;14(3):177.  
49 <https://doi.org/10.1093/pch/14.3.177>
- 50  
51 15 Peeters A, Barendregt JJ, Willekens F, Mackenbach JP, Al Mamun A, Bonneux L. Obesity in  
52 adulthood and its consequences for life expectancy: a life-table analysis. *Ann Intern Med*.  
53 2003;138(1):24-32. <https://doi.org/10.7326/0003-4819-138-1-200301070-00008>
- 54  
55 16 SHAN XY, Xi B, Cheng H, HOU DQ, Wang Y, Mi J. Prevalence and behavioral risk factors of  
56 overweight and obesity among children aged 2–18 in Beijing, China. *Int J Pediatr Obes*. 2010;5(5):383-9.  
57 <https://doi.org/10.3109/17477160903572001>
- 58  
59 17 Lin M, Pan L, Tang L, Jiang J, Wang Y, Jin R. Association of eating speed and energy intake of  
60 main meals with overweight in Chinese pre-school children. *Public Health Nutr*. 2014;17(9):2029-36.  
<https://doi.org/10.1017/S1368980013002176>

- 18 Song Y, Zhang X, Ma J, Zhang B, Hu PJ, Dong B. Behavioral risk factors for overweight and obesity among Chinese primary and middle school students in 2010. *Zhonghua yu fang yi xue za zhi* [Chinese journal of preventive medicine]. 2012;46(9):789. (Article in Chinese)
- 19 Zhang Y X, Wang S R. Prevalence and regional distribution of childhood overweight and obesity in Shandong Province, China. *World J Pediatr*, 2013, 9(2): 135-139.  
<https://doi.org/10.1007/s12519-012-0392-y>
- 20 Anselin L. Local indicators of spatial association—LISA. *Geogr Anal*. 1995;27(2):93-115.  
<https://doi.org/10.1111/j.1538-4632.1995.tb00338.x>
21. Zhang YX, Wang SR. Secular trends in body mass index and the prevalence of overweight and obesity among children and adolescents in Shandong, China, from 1985 to 2010. *J Public Health (Oxf)*. 2011;34(1):131-7. <https://doi.org/10.1093/pubmed/fdr053>
- 22 Qi Y, Li N, Jia T, Zhang G. Analysis on the relevant factors of obesity complicated with hypertension of overweight students from "health summer camp" of elementary and secondary schools in Shandong Province in 2015. *China Medical Herald*. 2016;13(36):89-92.( Article in Chinese)
- 23 Group of China Obesity Task Force . Body mass index reference norm for screening overweight and obesity in Chinese children and adolescents. *Zhonghua liu xing bing xue za zhi*. 2004;25(2):97.( Article in Chinese)
- 24 Pfeiffer D, Robinson T P, Stevenson M, et al. Spatial analysis in epidemiology. Oxford: Oxford University Press, 2008. <https://doi.org/10.1093/acprof:oso/9780198509882.001.0001>
- 25 Anselin L, Syabri I, Kho Y. GeoDa: An Introduction to Spatial Data Analysis. *Geogr Anal*. 2005;38(1):5-22. <https://doi.org/10.1111/j.0016-7363.2005.00671.x>
- 26 Zhang T, Cai L, Ma L, et al. The prevalence of obesity and influence of early life and behavioral factors on obesity in Chinese children in Guangzhou. *BMC public health*, 2016, 16(1): 954.  
<https://doi.org/10.1186/s12889-016-3599-3>
- 27 Guo X, Zheng L, Li Y, Zhang X, Yu S, Yang H, et al. Prevalence and risk factors of being overweight or obese among children and adolescents in northeast China. *Pediatr Res*. 2013;74(4):443-9. <https://doi.org/10.1038/pr.2013.116>
- 28 Li M, Dibley MJ, Sibbritt DW, Yan H. Dietary habits and overweight/obesity in adolescents in Xi'an City, China. *Asia Pac J Clin Nutr*. 2010;19(1):76-82.  
<http://dx.doi.org/10.6133%2fajpcn.2010.19.1.10>
- 29 Julia M, Van Weissenbruch M, Delemarre-van de Waal H, Surjono A. Influence of socioeconomic status on the prevalence of stunted growth and obesity in prepubertal Indonesian children. *Food Nutr Bull*. 2004;25(4):354-60. <https://doi.org/10.1177%2F156482650402500405>
- 30 Cheng TO. Fast food, automobiles, television and obesity epidemic in Chinese children. *Int J Cardiol*. 2005;98(1):173-4. <https://doi.org/10.1016/j.ijcard.2004.08.019>
- 31 Tremblay M S, Pérez C E, Ardern C I, et al. Obesity, overweight and ethnicity. *Health Rep*, 2005, 16(4): 23-34.
- 32 Zhang YX, Wang SR. Differences in development and the prevalence of obesity among children and adolescents in different socioeconomic status districts in Shandong, China. *Ann Hum Biol*. 2012;39(4):290-6. <https://doi.org/10.3109/03014460.2012.690888>
- 33 Contaldo F, Mazzarella G, Santarpia L, Marra M, Pisanisi F, Pizzuti R. Influence of urbanization on childhood obesity. *Nutr Metab Cardiovasc Dis*. 2015;25(6):615-6.  
<https://doi.org/10.1016/j.numecd.2015.03.002>
- 34 Zhang YX, Zhao JS, Chu ZH. Prevalence of overweight and obesity among children and



adolescents is associated with urbanization in Shandong, China. *Int J Cardiol.* 2014;176(3):1212-3.

<https://doi.org/10.1016/j.ijcard.2014.07.222>

35 Osei-Assibey G, Dick S, Macdiarmid J, et al. The influence of the food environment on overweight and obesity in young children: a systematic review. *BMJ open*, 2012, 2(6): e001538.

<http://dx.doi.org/10.1136/bmjopen-2012-001538>

36 Du S, Lü B, Wang Z, Zhai F. Transition of dietary pattern in China. *Journal of hygiene research.* 2001;30(4):221-5.( Article in Chinese)

37 Matheson D M, Killen J D, Wang Y, et al. Children's food consumption during television

viewing. *Am J Clin Nutr*, 2004, 79(6): 1088-1094. <https://doi.org/10.1093/ajcn/79.6.1088>

38 Poulou T, Elliott SJ. An exploratory spatial analysis of overweight and obesity in Canada. *Prev Med.* 2009;48(4):362-7. <https://doi.org/10.1016/j.ypmed.2009.01.017>

39 Penney TL, Rainham DG, Dummer TJ, Kirk SF. A spatial analysis of community level overweight and obesity. *J Hum Nutr Diet.* 2014;27(s2):65-74. <https://doi.org/10.1111/jhn.12055>

## Footnotes

**Contributors:** WZ planned the study, conducted the analysis and wrote the paper while being supervised by LZ\*; JJ, LS helped to plan the study, including the instrumentation, and to revise the manuscript; JZ, LW, and HS accomplished the statistical analysis and contributed to revising the paper. All authors All authors contributed to the discussion of the paper, read and approved the final manuscript.

**Funding:** This project was funded by the National Natural Science Foundation of China (grant number 71673169 and 71673170)

**Competing interests:** None declared.

**Patient consent:** Not required.

**Ethics approval:** This study was approved by the Academic Research Ethics Committee of Shandong University. Written informed consent was obtained from all participants.

**Provenance and peer review:** Not commissioned; externally peer reviewed.

1  
2  
3  
4  
5 **Data sharing statement:** No additional unpublished data.  
6  
7  
8  
9  
10  
11  
12  
13  
14  
15  
16  
17  
18  
19  
20  
21  
22  
23  
24  
25  
26  
27  
28  
29  
30  
31  
32  
33  
34  
35  
36  
37  
38  
39  
40  
41  
42  
43  
44  
45  
46  
47  
48  
49  
50  
51  
52  
53  
54  
55  
56  
57  
58  
59  
60

For peer review only

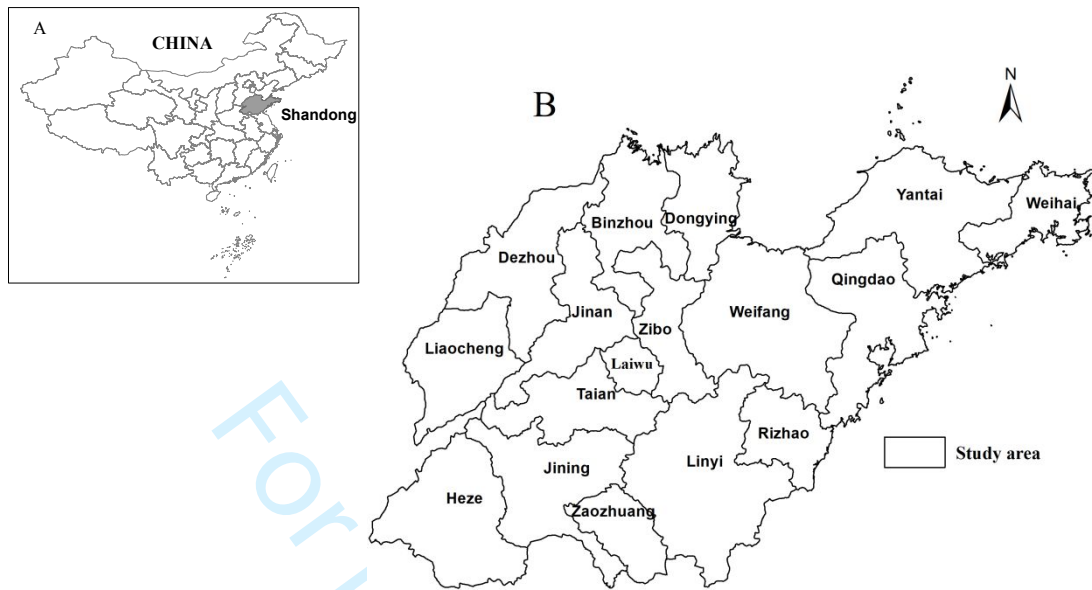

Fig. 1 A. Location of Shandong Province in China. B. Location of study area in Shandong Province

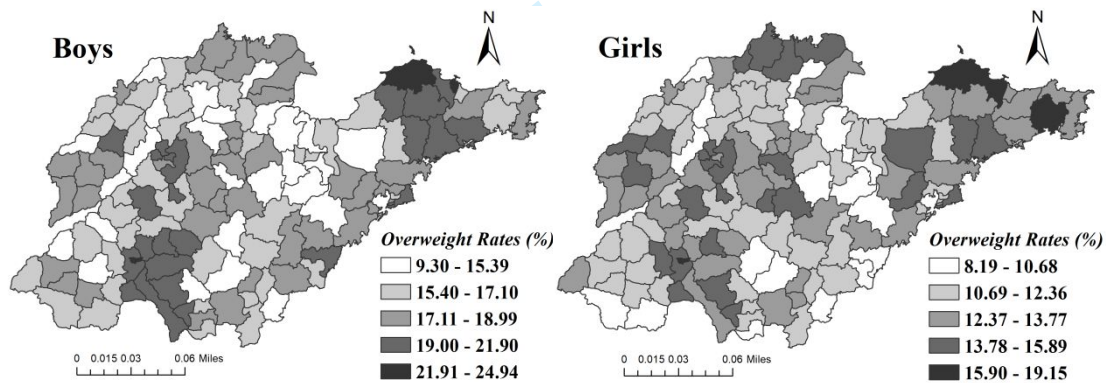

Fig. 2 Age-standardized overweight rates for boys and girls by county level in Shandong province

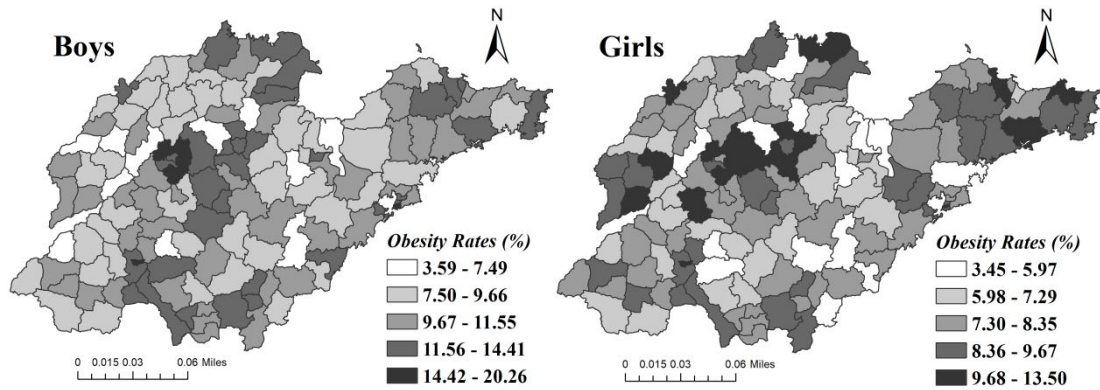

Fig. 3 Age-standardized obesity rates for boys and girls by county level in Shandong province

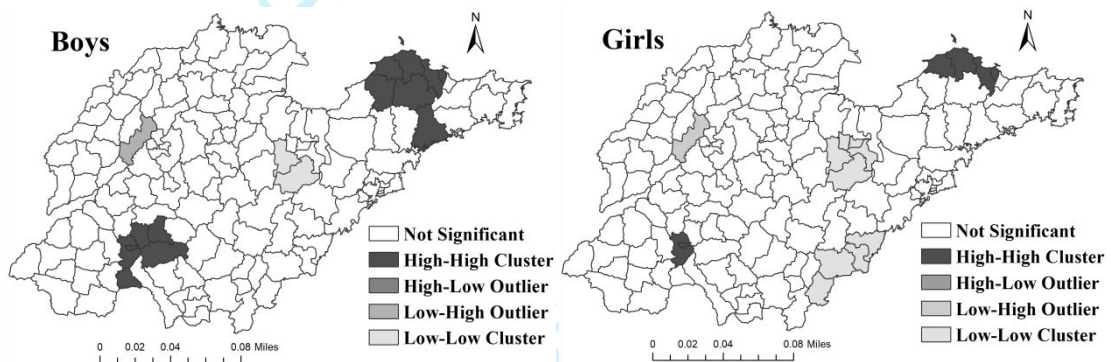

Fig. 4 LISA cluster maps for age-standardized overweight rates by county level in Shandong Province

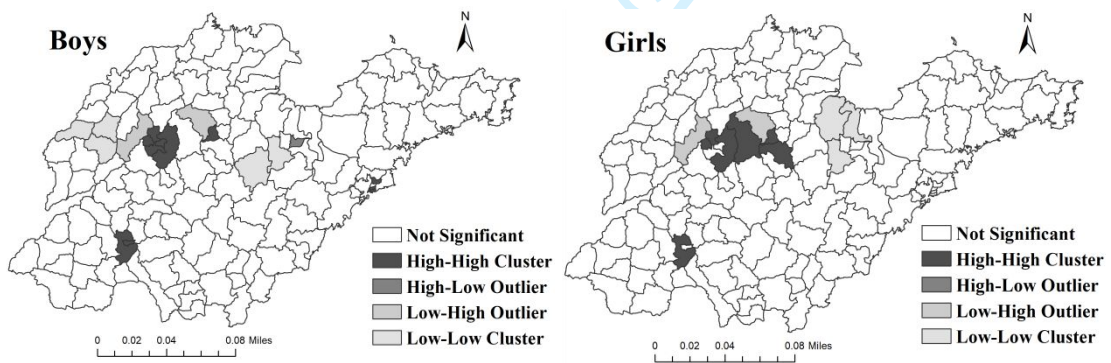

Fig. 5 LISA cluster maps for age-standardized obesity rates by county level in Shandong Province

STROBE Statement—Checklist of items that should be included in reports of *cross-sectional studies*

|                              | Item No | Recommendation                                                                                                                                                                                               | Page No |
|------------------------------|---------|--------------------------------------------------------------------------------------------------------------------------------------------------------------------------------------------------------------|---------|
| <b>Title and abstract</b>    | 1       | (a) Indicate the study's design with a commonly used term in the title or the abstract                                                                                                                       | 2       |
|                              |         | (b) Provide in the abstract an informative and balanced summary of what was done and what was found                                                                                                          | 2       |
| <b>Introduction</b>          |         |                                                                                                                                                                                                              |         |
| Background/rationale         | 2       | Explain the scientific background and rationale for the investigation being reported                                                                                                                         | 3       |
| Objectives                   | 3       | State specific objectives, including any prespecified hypotheses                                                                                                                                             | 4       |
| <b>Methods</b>               |         |                                                                                                                                                                                                              |         |
| Study design                 | 4       | Present key elements of study design early in the paper                                                                                                                                                      | 5       |
| Setting                      | 5       | Describe the setting, locations, and relevant dates, including periods of recruitment, exposure, follow-up, and data collection                                                                              | 5       |
| Participants                 | 6       | (a) Give the eligibility criteria, and the sources and methods of selection of participants                                                                                                                  | 5       |
| Variables                    | 7       | Clearly define all outcomes, exposures, predictors, potential confounders, and effect modifiers. Give diagnostic criteria, if applicable                                                                     | 5       |
| Data sources/<br>measurement | 8*      | For each variable of interest, give sources of data and details of methods of assessment (measurement). Describe comparability of assessment methods if there is more than one group                         | 5       |
| Bias                         | 9       | Describe any efforts to address potential sources of bias                                                                                                                                                    |         |
| Study size                   | 10      | Explain how the study size was arrived at                                                                                                                                                                    | 5       |
| Quantitative variables       | 11      | Explain how quantitative variables were handled in the analyses. If applicable, describe which groupings were chosen and why                                                                                 | 5       |
| Statistical methods          | 12      | (a) Describe all statistical methods, including those used to control for confounding                                                                                                                        | 6-7     |
|                              |         | (b) Describe any methods used to examine subgroups and interactions                                                                                                                                          | 6-7     |
|                              |         | (c) Explain how missing data were addressed                                                                                                                                                                  |         |
|                              |         | (d) If applicable, describe analytical methods taking account of sampling strategy                                                                                                                           |         |
|                              |         | (e) Describe any sensitivity analyses                                                                                                                                                                        |         |
| <b>Results</b>               |         |                                                                                                                                                                                                              |         |
| Participants                 | 13*     | (a) Report numbers of individuals at each stage of study—eg numbers potentially eligible, examined for eligibility, confirmed eligible, included in the study, completing follow-up, and analysed            | 7       |
|                              |         | (b) Give reasons for non-participation at each stage                                                                                                                                                         |         |
|                              |         | (c) Consider use of a flow diagram                                                                                                                                                                           |         |
| Descriptive data             | 14*     | (a) Give characteristics of study participants (eg demographic, clinical, social) and information on exposures and potential confounders                                                                     | 7       |
|                              |         | (b) Indicate number of participants with missing data for each variable of interest                                                                                                                          |         |
| Outcome data                 | 15*     | Report numbers of outcome events or summary measures                                                                                                                                                         | 8       |
| Main results                 | 16      | (a) Give unadjusted estimates and, if applicable, confounder-adjusted estimates and their precision (eg, 95% confidence interval). Make clear which confounders were adjusted for and why they were included | 8       |

|                          |    |                                                                                                                                                                            |       |
|--------------------------|----|----------------------------------------------------------------------------------------------------------------------------------------------------------------------------|-------|
|                          |    | (b) Report category boundaries when continuous variables were categorized                                                                                                  | 8     |
|                          |    | (c) If relevant, consider translating estimates of relative risk into absolute risk for a meaningful time period                                                           | 8     |
| Other analyses           | 17 | Report other analyses done—eg analyses of subgroups and interactions, and sensitivity analyses                                                                             | 9     |
| <b>Discussion</b>        |    |                                                                                                                                                                            |       |
| Key results              | 18 | Summarise key results with reference to study objectives                                                                                                                   | 9     |
| Limitations              | 19 | Discuss limitations of the study, taking into account sources of potential bias or imprecision. Discuss both direction and magnitude of any potential bias                 | 12    |
| Interpretation           | 20 | Give a cautious overall interpretation of results considering objectives, limitations, multiplicity of analyses, results from similar studies, and other relevant evidence | 10-12 |
| Generalisability         | 21 | Discuss the generalisability (external validity) of the study results                                                                                                      |       |
| <b>Other information</b> |    |                                                                                                                                                                            |       |
| Funding                  | 22 | Give the source of funding and the role of the funders for the present study and, if applicable, for the original study on which the present article is based              | 15    |

\*Give information separately for exposed and unexposed groups.

**Note:** An Explanation and Elaboration article discusses each checklist item and gives methodological background and published examples of transparent reporting. The STROBE checklist is best used in conjunction with this article (freely available on the Web sites of PLoS Medicine at <http://www.plosmedicine.org/>, Annals of Internal Medicine at <http://www.annals.org/>, and Epidemiology at <http://www.epidem.com/>). Information on the STROBE Initiative is available at [www.strobe-statement.org](http://www.strobe-statement.org).

# BMJ Open

## An Exploratory Spatial Analysis of Overweight and Obesity among Children and Adolescents in Shandong, China

|                                 |                                                                                                                                                                                                                                                                                                                                                                                                                                          |
|---------------------------------|------------------------------------------------------------------------------------------------------------------------------------------------------------------------------------------------------------------------------------------------------------------------------------------------------------------------------------------------------------------------------------------------------------------------------------------|
| Journal:                        | <i>BMJ Open</i>                                                                                                                                                                                                                                                                                                                                                                                                                          |
| Manuscript ID                   | bmjopen-2018-028152.R1                                                                                                                                                                                                                                                                                                                                                                                                                   |
| Article Type:                   | Research                                                                                                                                                                                                                                                                                                                                                                                                                                 |
| Date Submitted by the Author:   | 22-May-2019                                                                                                                                                                                                                                                                                                                                                                                                                              |
| Complete List of Authors:       | Qin, Wenzhe; Shandong University, School of Public Health<br>Wang, Lu; Shandong Province Health and Family Planning Commission, Shandong Provincial Medical Examination Office<br>Xu, Lingzhong; Shandong University<br>Sun, Long; Shandong University, School of public health<br>Li, Jiajia; Shandong University, School of Public Health<br>Zhang, Jiao; Shandong University, School of Public Health<br>Shao, Hui; Tulane University |
| <b>Primary Subject Heading</b>: | Public health                                                                                                                                                                                                                                                                                                                                                                                                                            |
| Secondary Subject Heading:      | Public health                                                                                                                                                                                                                                                                                                                                                                                                                            |
| Keywords:                       | Overweight, Obesity, Child and adolescent, Spatial analysis, Geographic location                                                                                                                                                                                                                                                                                                                                                         |
|                                 |                                                                                                                                                                                                                                                                                                                                                                                                                                          |

SCHOLARONE™  
Manuscripts

## Title Page

An Exploratory Spatial Analysis of Overweight and Obesity among Children and  
Adolescents in Shandong, China

Wenzhe Qin<sup>a#</sup>; Lu Wang<sup>b#</sup>; Lingzhong Xu<sup>a</sup>; Long Sun<sup>a</sup>; Jiajia Li<sup>a</sup>, Jiao Zhang<sup>a</sup>; Hui  
Shao<sup>c</sup>

- a. Department of Social Medicine and Health Service Management, School of Public Health, Shandong University, Jinan, Shandong, PR China
- b. Shandong Provincial Medical Examination Office, Jinan, Shandong, PR China
- c. Department of Global Health Systems and Development School of Public Health and Tropical Medicine, Tulane University, New Orleans, LA, United States

#: Wenzhe Qin and Lu Wang contributed equally to this work.

**Corresponding author:** Lingzhong Xu, Professor

Department of Social Medicine and Health Management, School of Public Health, Shandong University Center for Health Economics Experiment and Public Policy Research; NHC Key Laboratory of Health Economics and Policy Research, Jinan, 250012, China.

Tel and fax: +86-0531-88382648. Email: [lzxu@sdu.edu.cn](mailto:lzxu@sdu.edu.cn)

Word count: 3700



## Abstract

**Objective:** Identifying the spatial patterns of childhood overweight/obesity (OW/OB) can help to guide resource allocation for preventive intervention in China. The aim of this study is to estimate rates of childhood OW/OB across counties within Shandong Province, using geographic techniques to identify sex-specific spatial patterns of childhood OW/OB as well as the presence of spatial clusters.

**Design:** Cross-sectional study.

**Setting:** Shandong Province in China.

*Participants and Methods:* Data on 6,216,076 children and adolescents aged 7-18 years from the Primary and Secondary Schoolchildren Physical Examination Database for Shandong Province were used in this study. Spatial patterns of sex-specific prevalence of childhood OW/OB were mapped. Global autocorrelation statistic (Moran's I) and the Local Indicator of Spatial Association (LISA) were applied to assess the degree of spatial autocorrelation.

**Results:** The overall prevalence of childhood OW/OB in Shandong province were 15.05% and 9.23% respectively. Maps of sex-specific prevalence of OW/OB demonstrate a marked geographical variation of childhood OW/OB in different regions. Prevalence of childhood OW/OB had a significant positive spatial autocorrelation among both boys and girls. LISA analysis identified significant clusters (or 'hot spots') of childhood OW/OB in the eastern coastal region, central region and southwestern region.

**Conclusions:** The prevalence of childhood OW/OB is highly spatially clustered. Geographically focused appropriate intervention should be introduced in currently childhood OW/OB prevention and control strategy.

**Keywords:** Overweight; Obesity; Child and adolescent; Spatial analysis; Geographic location

### Strengths and limitations of this study

- With a large sample size, this study is a secondary analysis of census database of primary and secondary schoolchildren aged 7-18 years old in publicly

maintained schools in Shandong Province.

- Geographic techniques to identify sex-specific spatial patterns of childhood OW/OB as well as the presence of spatial clusters.
- This study provided information of understanding the role that place might play in the health status and the prevention of disease. This study also suggested the importance of improving interventions and health-related policies that based on assumptions of spatial heterogeneity.
- The absence of detailed information at the individual level limited research on the determinants of OW/OB on targeted clustered areas.
- As a cross-sectional study, the temporal and spatial trends of OW/OB cannot be verified.

## Introduction

Childhood obesity is one of the most serious public health challenges in the 21st century.<sup>1</sup> The prevalence of overweight and obesity (OW/OB) among children and adolescent has been rising rapidly in many developed countries and is affecting many low-and middle-income countries.<sup>2-5</sup> With rapid economic development over the past decades, China has also witnessed an increase in the prevalence of childhood obesity.<sup>6,7</sup> In 2013, approximately 23.0% and 14.0% of Chinese boys and girls aged 2–19 years were overweight or obese.<sup>8</sup> Overweight and obese children are more likely to stay obese into adulthood, and develop non-communicable diseases (NCDs) like diabetes and cardiovascular diseases at a younger age.<sup>9-11</sup> Even worse, childhood obesity is associated with a higher chance of premature death and disability in adulthood.<sup>12</sup>

Given its high prevalence and severe impact on health outcomes, researchers had poured attention into the modifiable determinants and driving factors of childhood OW/OB. Several studies have found that childhood OW/OB is multifactorial and complex and is considered to result when various genetic, behavioral, environmental, physiological, social and cultural factors interact.<sup>13-16</sup> It is increasingly recognized that where we live has an impact on our health. For example, the term “built environment”

1  
2  
3  
4 mainly determined leisure-time physical activity through the availability of parks,  
5 playgrounds or sport clubs, road traffic and transportation systems, and influenced  
6 dietary behavior by spatial accessibility to food through the patterns of food outlets and  
7 restaurants.<sup>17</sup> Changes in the lived in and built environment have been connected to the  
8 rise of obesity.<sup>18,19</sup> However, the geographical relevance between adjacent regions,  
9 especially in terms of lifestyle and social factors, were often neglected in current studies  
10 in Chinese schoolchildren. Considering the fact that the prevalence of OW/OB at one  
11 health region are likely to be correlated with prevalence in nearby regions, ignoring the  
12 clustering effect could potentially lead to biased estimation.<sup>20</sup>  
13  
14  
15  
16  
17  
18  
19  
20  
21  
22

23  
24 Geographic Information System (GIS) is a potentially 'powerful evidence-based  
25 practice tool' in community health, as they enable the identification of spatial  
26 epidemiology or the incidence of disease and can allow for effective allocation of  
27 resource in a spatial setting.<sup>21</sup> GIS have been employed in several innovative studies of  
28 OW/OB. For example, to explore regional variations and spatial clustering of obesity  
29 rates; to identify locations for targeted obesity intervention efforts.<sup>16,18,22-24</sup> In addition,  
30 most of the previous analysis were conducted using large geographical units such as  
31 provincial or city level, making it difficult to provide effective implementation of local  
32 policies or decisions for obesity prevention. Selecting the most appropriate scale or the  
33 smaller geographical areas (i.e., counties) makes the obesity interventions more  
34 targeted.  
35  
36  
37  
38  
39  
40  
41  
42  
43  
44  
45  
46

47 Shandong Province is an important littoral province in East China with a population of  
48 99.46 million in 2016, and covers an area of 156,700 square kilometers. It includes 140  
49 counties belonging to 17 administration regions (Figure 1). The prevalence of childhood  
50 obesity in Shandong Province in 2010 reached 15.83% and 7.12% among boys and girls,  
51 respectively.<sup>25</sup> In addition, the report of Primary and Secondary Schoolchildren  
52 Physical Examination in Shandong province in 2015 showed that the overall  
53 overweight and obesity rates of children and adolescent were 30.8% and 12.8%,  
54  
55  
56  
57  
58  
59  
60

1  
2  
3  
4 respectively.<sup>26</sup> The childhood OW/OB rates in Shandong province grew rapidly which  
5  
6 has caught up the prevalence of childhood OW/OB in developed countries.<sup>27</sup>  
7  
8

9  
10 Hence, the present study aimed to estimate rates of childhood OW/OB at the county  
11  
12 level and apply geographic techniques to examine the spatial patterns of childhood  
13  
14 OW/OB by gender, in particular to identify spatial cluster of areas with higher rates of  
15  
16 childhood OW/OB.  
17  
18

## 19 20 **Methods**

### 21 22 **Data sources and study design**

23  
24 This study comprised a cross-sectional secondary data analysis of the spatial  
25  
26 distribution of childhood OW/OB, using data from Primary and Secondary  
27  
28 Schoolchildren Physical Examination Database of Shandong Province. This database  
29  
30 contains schoolchildren aged 7-18 years old from all publicly primary and secondary  
31  
32 schools and vocational schools in 2017.  
33

34  
35 Shandong Province began to conduct health checkups for primary and secondary  
36  
37 schoolchildren in 2009 according to the requirements of National Health Commission  
38  
39 of China, and apply free health checkup for them every year. Primary and Secondary  
40  
41 Schoolchildren Physical Examination is organized by Health Commission of Shandong  
42  
43 Province (The author Wang Lu is one of leaders of the investigation team). The contents  
44  
45 of the medical examination mainly include: medicine and surgery, ophthalmology,  
46  
47 stomatology, physical indicators and physiological function indicators. The specific  
48  
49 process is as follows. Before the physical examination, the Health Commission of  
50  
51 Shandong Province selected and published the declared medical and health institutions.  
52  
53 According to the published list of medical institutions, educational institutions select  
54  
55 the nearest institution to enter schools for health examination of students. All  
56  
57 measurements were performed by well-trained health professionals in each medical  
58  
59 institution using the same type of apparatus and followed the same procedures and the  
60  
uniform date. During the period of physical examination, a special supervision team

1  
2  
3  
4 went to each physical examination site to conduct quality inspections. After physical  
5  
6 examination, the medical institutions responsible for the physical examination directly  
7  
8 input the physical examination data into the Primary and Secondary Schoolchildren  
9  
10 Physical Examination Database of Shandong Province. After the data entry, the expert  
11  
12 working group will conduct a random sampling checkup of all the entered physical  
13  
14 examination data to ensure the data quality.

15  
16 The physical examination was conducted by medical staffs from 1,373 medical  
17  
18 institutions in the whole province. The physical examination rate was 93.96%, and data  
19  
20 reporting rate was 100%. All children voluntarily joined this study and provided written  
21  
22 informed consent. We extracted individual information of schoolchildren and  
23  
24 adolescent, including codes of administrative divisions, age, gender, and measure of  
25  
26 height and weight. Body mass index (BMI) was calculated (Weight in kilograms  
27  
28 divided by height in meters squared:  $\text{kg/m}^2$ ). Childhood OW/OB were defined  
29  
30 according to the classification reference in different age and gender of the Working  
31  
32 Group for Obesity in China (WGOC), the cut-off points of which are 85th and 95th  
33  
34 percentiles of BMI, respectively (Overweight:  $85\text{th percentile} \leq \text{BMI} < 95\text{th percentile}$ ;  
35  
36 Obesity:  $\text{BMI} \geq 95\text{th percentile}$ ).<sup>28</sup> Using demographic data from the 2010 census as the  
37  
38 standard population, we estimated age-standardized rates of OW/OB for schoolchildren  
39  
40 and adolescent aged 7-18 years older at county level. The age-standardized rate is a  
41  
42 value that represents the ratio of observed incidence of disease to expected incidence  
43  
44 of disease, whereas a value of zero indicates an area with no observed overweight and  
45  
46 obese cases.

47  
48  
49 This study included 140 counties (city districts, county-level cities, and counties, often  
50  
51 referred to here as “counties”) of Shandong Province as spatial units. In practice, county  
52  
53 is a basic unit of administrative region in China, and is also the registered permanent  
54  
55 residence of the schoolchildren, which implements the national policies toward  
56  
57 population health and health promotion directly. In addition, China's unique household  
58  
59 registration system and student roll management system stipulates that primary school  
60

and secondary school must be completed in the household registration area, that is, in the county.

### Statistical analysis

A two-part analysis was conducted: firstly, the spatial distribution of age-standardized OW/OB rates was mapped for boys and girls. Following this, the second part focused on two aspects of the spatial clustering: the overall ‘global’ spatial clustering in the prevalence of OW/OB and the ‘local’ patterns of OW/OB.

Global Moran’s *I* statistic is a measure of global spatial autocorrelation, a value representing the similarity in OW/OB rates between neighboring regions, and the mathematical definition of Moran’s *I* is as follows.<sup>29,30</sup>

$$\text{Moran's } I = \frac{N \sum_{i=1}^N \sum_{j=1}^N W_{ij} (x_i - \bar{x})(x_j - \bar{x})}{\left( \sum_{i=1}^N \sum_{j=1}^N W_{ij} \right) \sum_{i=1}^N (x_i - \bar{x})^2} \quad (i \neq j)$$

Where  $W_{ij}$  is the spatial weights assigned to pairs of units (i.e. counties) between observations  $i$  and  $j$ ,  $N$  is equal to the total number of pixels.

The Moran’s *I* statistic ranges from +1 (for positive spatial autocorrelation where high values are proximal to other high values or low values adjacent to low values, i.e., clustering) to -1 (for negative autocorrelation where high values tend to be near low values, i.e., dispersion). A statistically significant ( $Z$  score  $\geq 1.96$ ,  $P$  value  $< 0.05$ ) estimate of Moran’s *I* indicates that neighboring counties have a similar prevalence rate of OW/OB and the cases are likely to cluster at county level. Nonsignificant values indicate no spatial autocorrelation or that the data are randomly distributed within the study’s geographical boundaries. In the present analysis, neighbors were defined using rooks case adjacency, which considers that all regions with common borders are neighbors.

Moran’s *I* statistic is a global test that does not identify where the clusters are located or what type of spatial autocorrelation is occurring (e.g. high-high cluster or low-low

1  
2  
3  
4 cluster etc.). To evaluate the existence of local clusters, it is necessary to use local  
5  
6 statistics. The local indicator of spatial autocorrelation (LISA) was therefore applied as  
7  
8 an indicator of local spatial association.<sup>20</sup> The local spatial autocorrelation decomposes  
9  
10 the global measurement into the contributions for each geographic region, detecting  
11  
12 homogeneity or heterogeneity in values around a given observation or used as  
13  
14 diagnostics for outliers in global patterns. The LISA measures whether, for each health  
15  
16 region, the standardized rate of OW/OB is closer to the values of its neighbors'. Inverse  
17  
18 distance weighting squared is again used to conceptualize the spatial relationships. To  
19  
20 ensure excellent statistical power and consider the computation times, 999 Monte Carlo  
21  
22 replications were set, and clusters with statistical significance of  $P < 0.05$  were reported.  
23  
24 Cluster maps were created using the results of statistical testing to illustrate the local  
25  
26 spatial patterns of significant positive and/or significant negative local spatial  
27  
28 autocorrelation. The local spatial autocorrelation analysis results in five categories of  
29  
30 health regions: (i) 'high-high' indicates clustering of high values of age-standardized  
31  
32 OW/OB rates (positive LISA value), (ii) 'low-high' indicates that low values are  
33  
34 adjacent to high values of age-standardized OW/OB rates (negative LISA value), (iii)  
35  
36 'low-low' indicates clustering of low values of age-standardized OW/OB rates  
37  
38 (positive LISA value), (iv) 'high-low' indicates that high values are adjacent to low  
39  
40 values of age-standardized OW/OB rates (negative LISA value), and (v) 'not significant'  
41  
42 indicates that there is no spatial autocorrelation. All analyses were conducted using  
43  
44 GeoDA<sup>31</sup> and ArcGis 10.3. The geography files were provided by National  
45  
46 Administration of Surveying, Mapping and Geo-information of China (NASG), the  
47  
48 administrative organization in charge of surveying and mapping undertaking across  
49  
50 China.

### 51 **Patient and public involvement**

52 No patients or public were involved in this study.

### 54 **Results**

#### 56 **Participants**

57  
58 After data cleaning, 6,216,076 qualified schoolchildren aged 7-18 years were finally  
59  
60

1  
2  
3  
4 included for analysis. Participating children were primarily Han ethnicity (>80%) and  
5  
6 were approximately equally distributed across sex (50.57% girls) with a mean (SD) age  
7  
8 of 10.94(2.62) years.

### 9 10 **Prevalence of overweight and obesity**

11 In Shandong province, the overall age-standardized rate of OW/OB were 15.05% and  
12  
13 9.23% respectively, which were higher than the national average rates of 5.45% and  
14  
15 2.83%. Also, the rate of overweight was 17.40% for boys and 12.73% for girls; the rate  
16  
17 of obesity was 10.49% for boys and 7.97% for girls. The age-standardized rate of  
18  
19 OW/OB in county level were higher in boys than girls ( $\chi^2=30.44$ ,  $P<0.001$ ).

20  
21  
22  
23 Age-standardized rates of overweight differed substantially across health regions  
24  
25 ranging from 9.3% in Qihe, Dezhou to 24.94% in Penglai, Yantai for boys and from  
26  
27 8.19% in Linshu, Linyi to 19.15% in Longkou, Yantai for girls. Obesity rates varied  
28  
29 substantially across health regions: from 3.59% in Changle, Weifang to 20.26% in  
30  
31 Central District in Jining for boys and from 3.45% in Zhanhua, Liaocheng to 13.5% in  
32  
33 Central District in Jining for girls. Age-standardized rates were also mapped by gender  
34  
35 at county level, and then classified by the rates (Figure2 and Figure 3).

### 36 37 38 39 **Spatial autocorrelation and cluster identification**

40  
41 Based on the aforementioned, there was a marked geographical variation of children  
42  
43 overweight/obesity in different regions indicating potential presence of spatial clusters  
44  
45 or spatial heterogeneity. The Moran's I statistic was applied to test the overall spatial  
46  
47 clustering. The results showed that there are significant positive spatial autocorrelations  
48  
49 in the data. In particular, the Moran's I statistic of age-standardized overweight rates  
50  
51 was 0.3736 (p-value=0.001) for boys and 0.3370 for girls (p-value=0.001). In addition,  
52  
53 the Moran's I statistic of age-standardized obesity rates was 0.2312 (p-value=0.001) for  
54  
55 boys and 0.1575 (p-value=0.006) for girls. The level of spatial autocorrelation across  
56  
57 health regions for age-standardized OW/OB rates were slightly higher in boys than girls.  
58  
59 For both sexes, the Moran's I statistic and corresponding p-values all suggest non-  
60



randomness in the overall spatial pattern of the age-standardized rates of overweight and obesity in Shandong province. Table 1 illustrates spatial correlation statistics and corresponding p-values as estimated by the Moran's I statistic.

Table 1 Spatial autocorrelation of age-standardized overweight/obesity rates in Shandong Province

|            | Moran's I | Z value | P value |
|------------|-----------|---------|---------|
| Overweight |           |         |         |
| Boys       | 0.3736    | 7.1726  | 0.001** |
| Girls      | 0.3370    | 6.1104  | 0.001** |
| Both sexes | 0.2704    | 5.1601  | 0.001** |
| Obesity    |           |         |         |
| Boys       | 0.2312    | 4.4350  | 0.001** |
| Girls      | 0.1575    | 3.0727  | 0.006** |
| Both sexes | 0.1130    | 2.2082  | 0.014*  |

Note: \*\*P<0.01; \*P<0.05.

We applied LISA to explore more information on the type and location of clustering. County-level LISA significant clusters were observed for both OW/OB (Fig.4 and Fig.5). For overweight boys, two larger hot spot (HH) was detected in the most counties of Yantai in eastern coastal region and Jining in southwest, and one smaller hot spot (HH) was found in Jinan in the central province. Two large cool spots (LL) were observed in the eastern and northwestern regions of Shandong province, and one smaller LL was found in a county in southwest. For the girls, the hot spot was comprised of the most counties in Yantai and two districts in Jinan and two counties in Jining. Two large cool spots were detected in the eastern regions (Fig.4). However, the pattern of clusters for obesity was different compared to that of overweight (Fig.5). For boys, the hot spot mainly distributed in the central region, and a small hot spot was detected in Qingdao in eastern coastal region. For girls, three hot spots were detected in Weihai in eastern coastal region, and in Jinan and Zibo in central region, and in Jining in southwest. In addition, several counties showed a dispersed pattern of cluster (HL or LH) as displayed in Fig. 4 and Fig.5.

## Discussions

1  
2  
3  
4 The present study illustrates the marked variability of OW/OB prevalence in Shandong  
5 province at the gender and health region level. The results also indicated that the age-  
6 standardized rate of both overweight and obesity among boys was higher compared to  
7 girls. Our spatial analysis showed the presence of spatial heterogeneity using a  
8 significant positive spatial autocorrelation identified by Moran's I statistic for both boys  
9 and girls as well as the significant local clusters identified by LISA across the province.  
10  
11  
12  
13  
14  
15

16  
17 The first concern is the Primary and Secondary Schoolchildren Physical Examination  
18 Database of Shandong Province. The census of physical examination for primary and  
19 secondary schoolchildren began in Shandong Province in 2009 and examine the  
20 physical condition of primary and secondary schoolchildren every year. With a census  
21 dataset, the physical health of every students can be mastered in addition to provide  
22 evidence for understanding the overall health of students. Several researches have  
23 explored the childhood health with the data from the National Surveys on Chinese  
24 Students' Constitution and Health in Shandong Province. The survey is conducted  
25 every five years and the data is obtained by sampling method, and the existence of  
26 sampling errors makes the data less stable. Although the census design increases the  
27 accuracy and stability of the data, the absence of other information at the individual  
28 level limited research on the factors of schoolchildren's health, such as socioeconomic  
29 factors, parental background, and psychological status.  
30  
31  
32  
33  
34  
35  
36  
37  
38  
39  
40  
41  
42  
43

44 The difference in OW/OB between boys and girls is consistent with results from  
45 previous studies in Shandong and throughout China.<sup>32,33</sup> Differences in age structure  
46 cannot explain this finding, as data have been age-standardized. Instead, in addition to  
47 the possible biologic/genetic factors, behavioral factors, family environment and  
48 psychological factors (e.g. body image perceptions) are also related to OW/OB in  
49 children. On a behavioral level, girls report being more attentive to food and its effects  
50 on health and weight control.<sup>34</sup> A study reported that consumption of foods and  
51 beverages outside three main meals and potato chips were more popular in boys than  
52 in girls.<sup>35</sup> Moreover, a review of studies found that boys are also higher users of TV  
53  
54  
55  
56  
57  
58  
59  
60

1  
2  
3  
4 and video games than girls, and these sedentary behaviors has also been associated with  
5 body composition and BMI.<sup>36</sup> There is some evidence that misconceptions about a  
6 child's weight status were prevalent among parents and grandparents, and boys' weight  
7 status was more frequently underestimated than girls.<sup>37</sup> On a psychological level related  
8 to body image, girls self-perceive as overweight more often than do boys.<sup>38</sup>  
9  
10  
11  
12  
13  
14

15 The global spatial autocorrelation demonstrates that there is significant positive spatial  
16 autocorrelation in the data, which showed higher levels of correlation in similar  
17 OW/OB rates between neighboring counties in the whole provincial. The spatial  
18 patterns of OW/OB might be explained by some possible reasons of neighborhood  
19 characteristics. First, neighboring county residents may share similar socio-economic  
20 backgrounds, a well-established correlate to obesity.<sup>39</sup> Second, as residents in  
21 neighboring areas are likely to share similar lifestyles in relation to diet, nutritional  
22 habits and physical activity, it could be that residents of adjacent areas with similar  
23 obesity rates, share behaviors that promote this condition.<sup>18</sup> Moreover, adjacent areas  
24 also share similar social and built characteristics and therefore the clustered areas may  
25 also share similar features. It is worth noting that the racial/ethnic differences might  
26 also be a possible reason. A previous study shown that living in neighborhoods with a  
27 higher proportion of foreign-born residents is associated with reduced child obesity  
28 risk.<sup>40</sup> Further research would be necessary to tease out the actual mechanism driving  
29 the gradient in OW/OB in these areas. In addition, prospective cohort studies and  
30 experimental studies were needed to explore the long-term effects of neighborhood  
31 environment directly to the development of obesity.  
32  
33  
34  
35  
36  
37  
38  
39  
40  
41  
42  
43  
44  
45  
46  
47  
48  
49

50 The LISA found also that the hot spots (HH) were detected in Yantai of eastern coastal  
51 region, Jinan in the central region and Jining in the southwestern inland region among  
52 both boys and girls. Again, the cold spots (LL) and other dispersed patterns of cluster  
53 (HL or LH) were observed. Some potential explanations for the different type of  
54 clusters are as follows. First, the regional SES might be the influenced factor  
55 responsible for the geographic differences in the prevalence of childhood obesity. Some  
56  
57  
58  
59  
60

1  
2  
3  
4 previous studies had confirmed that the regional SES affected to the distribution of  
5 OW/OB positively in China, in other words, high SES youths are more likely to be  
6 OW/OB than other lower SES counterparts.<sup>41</sup> The evidence provided by research  
7 indicated that OW/OB prevalence was greater and increased more quickly in the coastal  
8 counterparts.<sup>7</sup> Eastern coastal region has high SES with more developed economy, the  
9 living standards, nutritional conditions and public health are better than other SES  
10 districts. Secondly, with the fast-growing Chinese economy, the rapid urbanization has  
11 narrowed the disparity between coastal and inland counterparts and became a potential  
12 contributor that cannot be ignored.<sup>42,43</sup> That is the reason why the hot spot of OW/OB  
13 for children also occurred in inland region. In addition to the aforementioned factors,  
14 the traditional Chinese diet is shifting toward a diet with high fat, high energy density  
15 and low dietary fiber on the whole, changes which have resulted in rapid increases in  
16 the prevalence of OW/OB.<sup>44</sup> Moreover, television viewing or surf the Internet besides  
17 reducing physical activity also leads to increased consumption of energy-rich foods  
18 through incessant commercial advertisement.<sup>45</sup> These factors lead to a rapid increase in  
19 the prevalence of overweight and obesity among children and adolescent.

20  
21  
22  
23  
24  
25  
26  
27  
28  
29  
30  
31  
32  
33  
34  
35  
36  
37 The strength of this study is that the data comes from the Primary and Secondary  
38 Schoolchildren Physical Examination Database with a large sample size in Shandong  
39 Province, China. Examination survey provided direct measurements of weight and  
40 height, and avoided bias in self-reported data. The results are important for  
41 understanding the role that place might play in the health status and suggesting the  
42 importance of improving interventions and health-related policies that are thus far  
43 mainly based on assumptions of spatial homogeneity. In addition, the findings verified  
44 the effectiveness of spatial data analysis methods and in particular the helpful means of  
45 cluster analysis for public health professionals and policy makers. For instance, based  
46 on the potential explanations for the identified clusters, existing policies and practices  
47 could provide funding for physical education as well as recreation centers in  
48 communities most in need. Furthermore, it may be advantageous from the perspective  
49 that exploring areas of low prevalence to ascertain which factors might decrease risk of  
50  
51  
52  
53  
54  
55  
56  
57  
58  
59  
60

1  
2  
3  
4 the population. Further research is required to explore the underlying mechanism for  
5 the increased levels of OW/OB on clustered areas, and investigate the impact of area  
6 level characteristics on the spatial patterns identified.  
7  
8  
9

10  
11 This study has several limitations. First, the absence of detailed information at the  
12 individual level limited research on the determinants of OW/OB on targeted clustered  
13 areas. Second, the study may also be affected by the modifiable areal unit problem. The  
14 spatial scale used is not unique and typically arbitrary and modifiable, the spatial  
15 patterns of OW/OB identified may change depending on different scales. In addition,  
16 we only analyzed the data for one year, due to data availability, the temporal and spatial  
17 trends of OW/OB cannot be verified.  
18  
19  
20  
21  
22  
23  
24  
25  
26  
27

## 28 **Conclusions**

29  
30 A high prevalence of childhood OW/OB was observed in Shandong Province, one of  
31 the populous provinces in China. There were marked sex-specific regional differences  
32 in the prevalence of childhood OW/OB, along with a tendency of spatial correlation of  
33 the childhood OW/OB. In addition, the spatial clusters provide valuable information on  
34 the identification of local geographical variation and elevated risk of OW/OB in  
35 Shandong province. Therefore, prevention and health promotion interventions as well  
36 as effective allocation of resources and services should be implemented based on  
37 regional and population specific demands. For the hot spots of childhood OW/OB,  
38 resource allocation is mainly concentrated in three aspects. First, through the health  
39 education of parents, they are encouraged to establish a healthy lifestyle, which in turn  
40 affects children's cognition and diet behavior; In addition, the schools should develop  
41 appropriate health strategies, including education on nutrition knowledge, increased  
42 physical activity, and encourage children to establish health behaviors; Furthermore,  
43 government should provide more interventions for hot spots of childhood OW/OB,  
44 including developing dietary guidelines, increasing community exercise facilities, and  
45 conducting health education.  
46  
47  
48  
49  
50  
51  
52  
53  
54  
55  
56  
57  
58  
59  
60

## Acknowledgment

We would like to thank Shandong University Center for Health Economics Experiment and Public Policy Research; NHC Key Laboratory of Health Economics and Policy Research for the supports.

## Reference

1. WHO. Childhood overweight and obesity 2018. Available from: <http://www.who.int/dietphysicalactivity/childhood/en/>.
2. Ogden CL, Carroll MD, Kit BK, et al. Prevalence of Childhood and Adult Obesity in the United States, 2011-2012. *Jama*. 2014;311(8):806. <http://dx.doi.org/10.1001/jama.2014.732>
3. Stamatakis E, Wardle J, Cole TJ. Childhood obesity and overweight prevalence trends in England: evidence for growing socioeconomic disparities. *Int J Obes*. 2010;34(1):41-7. <http://dx.doi.org/10.1038/ijo.2009.217>
4. Abarca-Gómez L, Abdeen ZA, Hamid ZA, et al. Worldwide trends in body-mass index, underweight, overweight, and obesity from 1975 to 2016: a pooled analysis of 2416 population-based measurement studies in 128·9 million children, adolescents, and adults. *The Lancet*. 2017;390(10113):2627-42. [https://doi.org/10.1016/S0140-6736\(17\)32129-3](https://doi.org/10.1016/S0140-6736(17)32129-3)
5. Cheng TO. Obesity in Chinese children. *J Roy Soc Med*. 2004;97(5):254. <http://dx.doi.org/10.1177/014107680409700519>
6. Ji CY. The prevalence of childhood overweight/obesity and the epidemic changes in 1985-2000 for Chinese school-age children and adolescents. *Obes Rev*. 2010;9(s1):78-81. <http://dx.doi.org/10.1111/j.1467-789X.2007.00443.x>
7. Ji CY, Cheng TO. Epidemic increase in overweight and obesity in Chinese children from 1985 to 2005. *Int J Cardiol*. 2009;132(1):1-10. <http://dx.doi.org/10.1016/j.ijcard.2008.07.003>
8. Ng M, Fleming T, Robinson M, et al. Global, regional, and national prevalence of overweight and obesity in children and adults during 1980-2013: a systematic analysis for the Global Burden of Disease Study 2013. *The lancet*. 2014;384(9945):766-81. [https://dx.doi.org/10.1016%2FS0140-6736\(14\)60460-8](https://dx.doi.org/10.1016%2FS0140-6736(14)60460-8)
9. Wang Y, Lobstein T. Worldwide trends in childhood overweight and obesity. *Int J Pediatr Obes*. 2006;1(1):11-25. <https://doi.org/10.1080/1747716060058674>
10. Kelly AS, Barlow SE, Rao G, et al. Severe obesity in children and adolescents: identification, associated health risks, and treatment approaches: a scientific statement from the American Heart Association. *Circulation*. 2013;128:1689-712. <https://doi.org/10.1161/CIR.0b013e3182a5cfb3>
11. Bridger T. Childhood obesity and cardiovascular disease. *Paed Child Health*. 2009;14(3):177. <https://doi.org/10.1093/pch/14.3.177>
12. Peeters A, Barendregt JJ, Willekens F, et al. Obesity in adulthood and its consequences for life expectancy: a life-table analysis. *Ann Internl Med*. 2003;138(1):24-32. <https://doi.org/10.7326/0003-4819-138-1-200301070-00008>
13. Shan XY, Xi B, Cheng H, et al. Prevalence and behavioral risk factors of overweight and obesity among children aged 2-18 in Beijing, China. *Int J Pediatr Obes*. 2010;5(5):383-9. <https://doi.org/10.3109/17477160903572001>
14. Lin M, Pan L, Tang L, et al. Association of eating speed and energy intake of main meals

- with overweight in Chinese pre-school children. *Public Health Nutr.* 2014;17(9):2029-36.  
<https://doi.org/10.1017/S1368980013002176>
15. Song Y, Zhang X, Ma J, et al. Behavioral risk factors for overweight and obesity among Chinese primary and middle school students in 2010. *Zhonghua yu fang yi xue za zhi* [Chinese journal of preventive medicine]. 2012;46(9):789. (Article in Chinese)
16. Fang D, Thomsen MR, Nayga RM, et al. Association of Neighborhood Geographic Spatial Factors With Rates of Childhood Obesity. *JAMA Netw Open.* 2018;1(4):e180954-e.  
<https://doi.org/10.1001/jamanetworkopen.2018.0954>
17. Story M, Kaphingst KM, et al. Creating healthy food and eating environments: policy and environmental approaches. *Annu Rev Public Health.* 2008;29:253-72.  
<https://doi.org/10.1146/annurev.publhealth.29.020907.090926>
18. Paisi M. Obesity and Dental Caries in Children in Plymouth: University of Plymouth; 2017.  
<http://hdl.handle.net/10026.1/9582>
19. Casey R, Oppert J-M, Weber C, et al. Determinants of childhood obesity: what can we learn from built environment studies? *Food Qual Prefer.* 2014;31:164-72.  
<https://doi.org/10.1016/j.foodqual.2011.06.003>
20. Anselin L. Local indicators of spatial association—LISA. *Geogr Anal.* 1995;27(2):93-115.  
<https://doi.org/10.1111/j.1538-4632.1995.tb00338.x>
21. McLafferty SL. GIS and health care. *Annu Rev Public Health.* 2003;24(1):25-42.  
<https://doi.org/10.1146/annurev.publhealth.24.012902.141012>
22. Fraser LK, Clarke GP, Cade JE, et al. Fast food and obesity: a spatial analysis in a large United Kingdom population of children aged 13–15. *Am J Prev med.* 2012;42(5):e77-e85.  
<https://doi.org/10.1016/j.amepre.2012.02.007>
23. Poulidou T, Elliott SJ. An exploratory spatial analysis of overweight and obesity in Canada. *Prev Med.* 2009;48(4):362-7. <https://doi.org/10.1016/j.yjpm.2009.01.017>
24. Hughey SM, Kaczynski AT, Porter DE, et al. Spatial clustering patterns of child weight status in a southeastern US county. *Appl Geogr.* 2018;99:12-21.  
<https://doi.org/10.1016/j.apgeog.2018.07.016>
25. Zhang YX, Wang SR. Secular trends in body mass index and the prevalence of overweight and obesity among children and adolescents in Shandong, China, from 1985 to 2010. *J Public Health.* 2011;34(1):131-7. <https://doi.org/10.1093/pubmed/fdr053>
26. Qi Y, Li N, Jia T, et al. Analysis on the relevant factors of obesity complicated with hypertension of overweight students from "health summer camp" of elementary and secondary schools in Shandong Province in 2015. *China Medical Herald.* 2016;13(36):89-92. (Article in Chinese)
27. Wang Y, Lim H. The global childhood obesity epidemic and the association between socio-economic status and childhood obesity. *Int J Psychiatry.* 2012;24(3): 176-188.  
<https://doi.org/10.3109/09540261.2012.688195>
28. Group of China Obesity Task Force. Body mass index reference norm for screening overweight and obesity in Chinese children and adolescents. *Zhonghua liu xing bing xue za zhi.* 2004;25(2):97. (Article in Chinese)
29. Pfeiffer D, Robinson TP, Stevenson M, et al. Spatial analysis in epidemiology: Oxford University Press Oxford; 2008. <https://doi.org/10.1093/acprof:oso/9780198509882.001.0001>
30. Wheeler D, Shaw G, Barr S. Statistical techniques in geographical analysis: Routledge; 2013.

<https://doi.org/10.4324/9780203821503>

31. Anselin L, Syabri I, Kho Y. GeoDa: An Introduction to Spatial Data Analysis. *Geogr Anal.* 2005;38(1):5-22. <https://doi.org/10.1111/j.0016-7363.2005.00671.x>
32. Zhang T, Li C, Lu M, et al. The prevalence of obesity and influence of early life and behavioral factors on obesity in Chinese children in Guangzhou. *Bmc Public Health.* 2016;16(1):954. <https://doi.org/10.1186/s12889-016-3599-3>
33. Guo X, Zheng L, Li Y, et al. Prevalence and risk factors of being overweight or obese among children and adolescents in northeast China. *Pediatr Res.* 2013;74(4):443-9. <https://doi.org/10.1038/pr.2013.116>
34. Wardle J, Haase AM, Steptoe A, et al. Gender differences in food choice: the contribution of health beliefs and dieting. *Ann Behav Med.* 2004;27(2):107-16. [https://doi.org/10.1207/s15324796abm2702\\_5](https://doi.org/10.1207/s15324796abm2702_5)
35. Li M, Dibley MJ, Sibbritt DW, et al. Dietary habits and overweight/obesity in adolescents in Xi'an City, China. *Asia Pac J Clin Nutr.* 2010;19(1):76-82. <http://dx.doi.org/10.6133%2fajcn.2010.19.1.10>
36. Marshall SJ, Gorely T, Biddle SJ. A descriptive epidemiology of screen-based media use in youth: a review and critique. *J Adolesc.* 2006;29(3):333-49. <https://doi.org/10.1016/j.adolescence.2005.08.016>
37. Li J, Lei J, Wen S, et al. Sex disparity and perception of obesity/overweight by parents and grandparents. *Paediatr Child Health.* 2014;19(7):e113-e6. <https://doi.org/10.1093/pch/19.7.e113>
38. O'dea JA. Gender, ethnicity, culture and social class influences on childhood obesity among Australian schoolchildren: implications for treatment, prevention and community education. *Health Soc Care Community.* 2008;16(3):282-90. <https://doi.org/10.1111/j.1365-2524.2008.00768.x>
39. Penney T, Rainham D, Dummer T, et al. A spatial analysis of community level overweight and obesity. *Hum Nutr Appl Nutr.* 2014;27:65-74. <https://doi.org/10.1111/jhn.12055>
40. Kimbro RT, Denney JT. Neighborhood context and racial/ethnic differences in young children's obesity: structural barriers to interventions. *Soc Sci Med.* 2013;95:97-105. <https://doi.org/10.1016/j.socscimed.2012.09.032>
41. Zhang YX, Wang SR. Differences in development and the prevalence of obesity among children and adolescents in different socioeconomic status districts in Shandong, China. *Ann Hum Biol.* 2012;39(4):290-6. <https://doi.org/10.3109/03014460.2012.690888>
42. Contaldo F, Mazzarella G, Santarpia L, et al. Influence of urbanization on childhood obesity. *Nutr Metab Cardiovas.* 2015;25(6):615-6. <https://doi.org/10.1016/j.numecd.2015.03.002>
43. Zhang YX, Zhao JS, Chu ZH. Prevalence of overweight and obesity among children and adolescents is associated with urbanization in Shandong, China. *Int J Cardiol.* 2014;176(3):1212-3. <https://doi.org/10.1016/j.ijcard.2014.07.222>
44. Du S, Lü B, Wang Z, et al. Transition of dietary pattern in China. *Journal of hygiene research.* 2001;30(4):221-5. (Article in Chinese)
45. Matheson DM, Killen JD, Wang Y, et al. Children's food consumption during television viewing. *Am J Clin Nutr.* 2004;79(6):1088-94. <https://doi.org/10.1093/ajcn/79.6.1088>



## Footnotes

**Contributors:** Wenzhe Qin planned the study, conducted the analysis and wrote the paper while being supervised by Lingzhong Xu\*; Lu Wang, Jiajia Li, Long Sun helped to plan the study, including the instrumentation, and to revise the manuscript; Jiao Zhang and Hui Shao accomplished the statistical analysis and contributed to revising the paper. All authors contributed to the discussion of the paper, read and approved the final manuscript.

**Funding:** This project was funded by the National Natural Science Foundation of China (grant number 71673169 and 71673170)

**Competing interests:** None declared.

**Patient consent for publication:** Obtained.

**Ethics approval:** This study was approved by the Academic Research Ethics Committee of Shandong University.

**Provenance and peer review:** Not commissioned; externally peer reviewed.

**Data sharing statement:** No additional unpublished data.

Figure legends: Figure 1. Location of study area in Shandong Province, China (The map has obtained permission from National Administration of Surveying, Mapping and Geoinformation of China (NASG))

Figure 2. Age-standardized overweight rates for boys and girls by county level in Shandong province (The map has obtained permission from National Administration of Surveying, Mapping and Geoinformation of China (NASG))

Figure 3. Age-standardized obesity rates for boys and girls by county level in Shandong province (The map has obtained permission from National Administration of Surveying, Mapping and Geoinformation of China (NASG))

Figure 4. LISA cluster maps for age-standardized overweight rates by county level in Shandong Province (The map has obtained permission from National Administration of Surveying, Mapping and Geoinformation of China (NASG))

Figure 5. LISA cluster maps for age-standardized obesity rates by county level in Shandong Province (The map has obtained permission from National Administration of Surveying, Mapping and Geoinformation of China (NASG))

1  
2  
3  
4  
5  
6  
7  
8  
9  
10  
11  
12  
13  
14  
15  
16  
17  
18  
19  
20  
21  
22  
23  
24  
25  
26  
27  
28  
29  
30  
31  
32  
33  
34  
35  
36  
37  
38  
39  
40  
41  
42  
43  
44  
45  
46  
47  
48  
49  
50  
51  
52  
53  
54  
55  
56  
57  
58  
59  
60

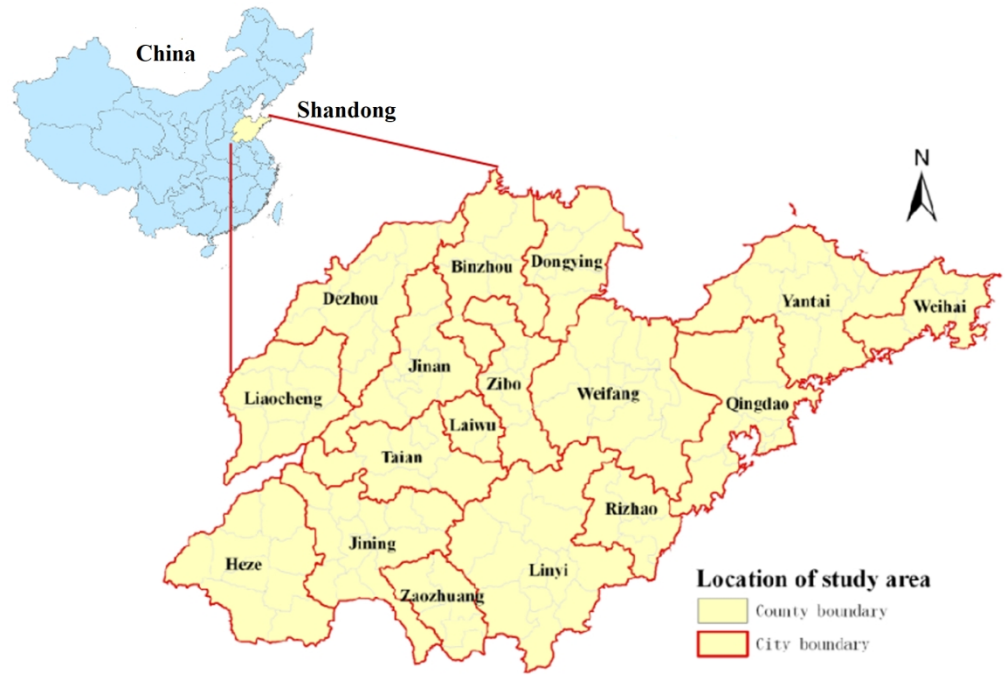

Figure 1. Location of study area in Shandong Province, China(The map has obtained permission from National Administration of Surveying, Mapping and Geoinformation of China (NASG))

174x118mm (300 x 300 DPI)

1  
2  
3  
4  
5  
6  
7  
8  
9  
10  
11  
12  
13  
14  
15  
16  
17  
18  
19  
20  
21  
22  
23  
24  
25  
26  
27  
28  
29  
30  
31  
32  
33  
34  
35  
36  
37  
38  
39  
40  
41  
42  
43  
44  
45  
46  
47  
48  
49  
50  
51  
52  
53  
54  
55  
56  
57  
58  
59  
60

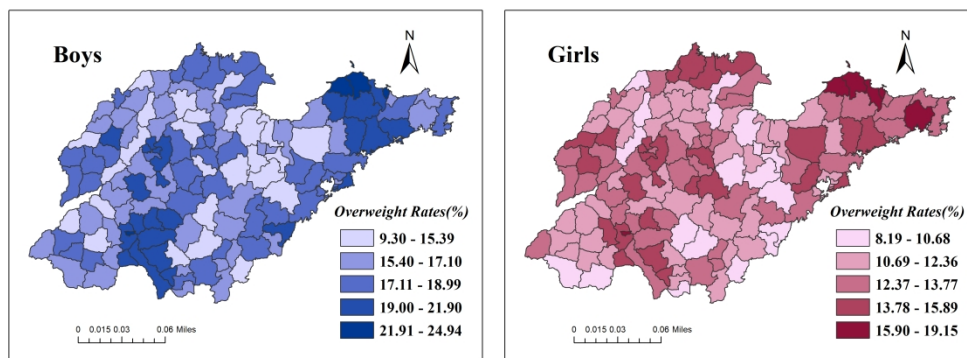

Figure 2. Age-standardized overweight rates for boys and girls by county level in Shandong province (The map has obtained permission from National Administration of Surveying, Mapping and Geoinformation of China (NASG))

411x159mm (300 x 300 DPI)

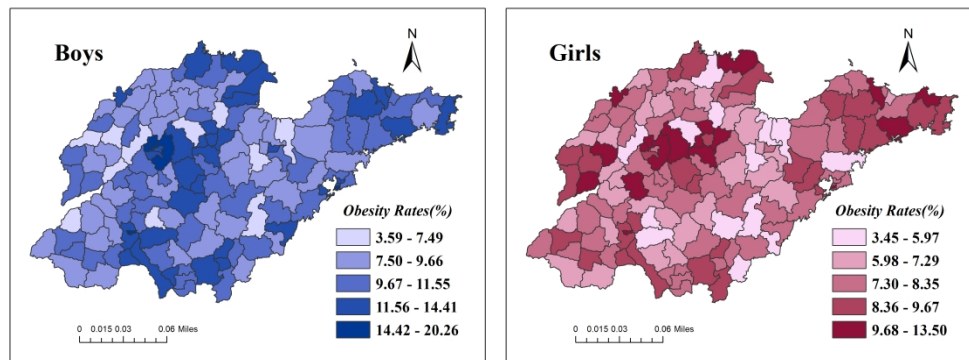

Figure 3. Age-standardized obesity rates for boys and girls by county level in Shandong province(The map has obtained permission from National Administration of Surveying, Mapping and Geoinformation of China (NASG))

409x157mm (300 x 300 DPI)

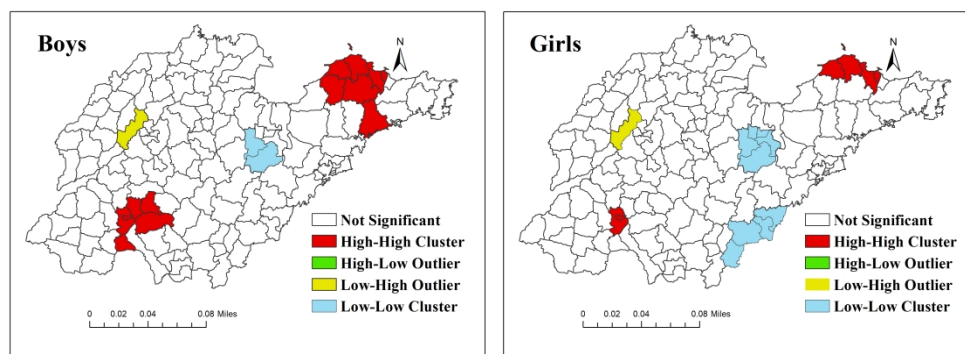

Figure 4. LISA cluster maps for age-standardized overweight rates by county level in Shandong Province(The map has obtained permission from National Administration of Surveying, Mapping and Geoinformation of China (NASG))

409x154mm (300 x 300 DPI)

1  
2  
3  
4  
5  
6  
7  
8  
9  
10  
11  
12  
13  
14  
15  
16  
17  
18  
19  
20  
21  
22  
23  
24  
25  
26  
27  
28  
29  
30  
31  
32  
33  
34  
35  
36  
37  
38  
39  
40  
41  
42  
43  
44  
45  
46  
47  
48  
49  
50  
51  
52  
53  
54  
55  
56  
57  
58  
59  
60

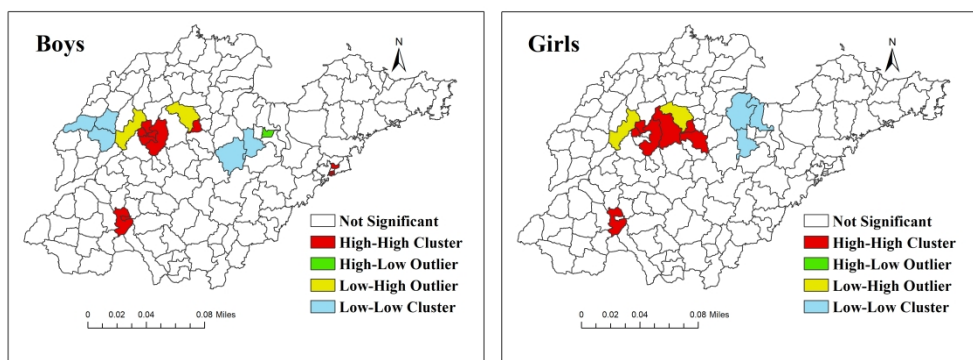

Figure 5. LISA cluster maps for age-standardized obesity rates by county level in Shandong Province(The map has obtained permission from National Administration of Surveying, Mapping and Geoinformation of China (NASG))

409x154mm (300 x 300 DPI)

STROBE Statement—Checklist of items that should be included in reports of *cross-sectional studies*

|                           | Item No | Recommendation                                                                                                                                                                                               | Page No |
|---------------------------|---------|--------------------------------------------------------------------------------------------------------------------------------------------------------------------------------------------------------------|---------|
| <b>Title and abstract</b> | 1       | (a) Indicate the study's design with a commonly used term in the title or the abstract                                                                                                                       | 1       |
|                           |         | (b) Provide in the abstract an informative and balanced summary of what was done and what was found                                                                                                          | 1       |
| <b>Introduction</b>       |         |                                                                                                                                                                                                              |         |
| Background/rationale      | 2       | Explain the scientific background and rationale for the investigation being reported                                                                                                                         | 2       |
| Objectives                | 3       | State specific objectives, including any prespecified hypotheses                                                                                                                                             | 4       |
| <b>Methods</b>            |         |                                                                                                                                                                                                              |         |
| Study design              | 4       | Present key elements of study design early in the paper                                                                                                                                                      | 4       |
| Setting                   | 5       | Describe the setting, locations, and relevant dates, including periods of recruitment, exposure, follow-up, and data collection                                                                              | 5       |
| Participants              | 6       | (a) Give the eligibility criteria, and the sources and methods of selection of participants                                                                                                                  | 5       |
| Variables                 | 7       | Clearly define all outcomes, exposures, predictors, potential confounders, and effect modifiers. Give diagnostic criteria, if applicable                                                                     | 5       |
| Data sources/measurement  | 8*      | For each variable of interest, give sources of data and details of methods of assessment (measurement). Describe comparability of assessment methods if there is more than one group                         | 4       |
| Bias                      | 9       | Describe any efforts to address potential sources of bias                                                                                                                                                    |         |
| Study size                | 10      | Explain how the study size was arrived at                                                                                                                                                                    | 7       |
| Quantitative variables    | 11      | Explain how quantitative variables were handled in the analyses. If applicable, describe which groupings were chosen and why                                                                                 | 5       |
| Statistical methods       | 12      | (a) Describe all statistical methods, including those used to control for confounding                                                                                                                        | 6-7     |
|                           |         | (b) Describe any methods used to examine subgroups and interactions                                                                                                                                          | 6-7     |
|                           |         | (c) Explain how missing data were addressed                                                                                                                                                                  |         |
|                           |         | (d) If applicable, describe analytical methods taking account of sampling strategy                                                                                                                           |         |
|                           |         | (e) Describe any sensitivity analyses                                                                                                                                                                        |         |
| <b>Results</b>            |         |                                                                                                                                                                                                              |         |
| Participants              | 13*     | (a) Report numbers of individuals at each stage of study—eg numbers potentially eligible, examined for eligibility, confirmed eligible, included in the study, completing follow-up, and analysed            | 7       |
|                           |         | (b) Give reasons for non-participation at each stage                                                                                                                                                         |         |
|                           |         | (c) Consider use of a flow diagram                                                                                                                                                                           |         |
| Descriptive data          | 14*     | (a) Give characteristics of study participants (eg demographic, clinical, social) and information on exposures and potential confounders                                                                     | 7-8     |
|                           |         | (b) Indicate number of participants with missing data for each variable of interest                                                                                                                          |         |
| Outcome data              | 15*     | Report numbers of outcome events or summary measures                                                                                                                                                         | 8-9     |
| Main results              | 16      | (a) Give unadjusted estimates and, if applicable, confounder-adjusted estimates and their precision (eg, 95% confidence interval). Make clear which confounders were adjusted for and why they were included | 8-9     |

|                          |    |                                                                                                                                                                            |       |
|--------------------------|----|----------------------------------------------------------------------------------------------------------------------------------------------------------------------------|-------|
|                          |    | (b) Report category boundaries when continuous variables were categorized                                                                                                  | 8-9   |
|                          |    | (c) If relevant, consider translating estimates of relative risk into absolute risk for a meaningful time period                                                           | 8-9   |
| Other analyses           | 17 | Report other analyses done—eg analyses of subgroups and interactions, and sensitivity analyses                                                                             | 9     |
| <b>Discussion</b>        |    |                                                                                                                                                                            |       |
| Key results              | 18 | Summarise key results with reference to study objectives                                                                                                                   | 9-10  |
| Limitations              | 19 | Discuss limitations of the study, taking into account sources of potential bias or imprecision. Discuss both direction and magnitude of any potential bias                 | 13    |
| Interpretation           | 20 | Give a cautious overall interpretation of results considering objectives, limitations, multiplicity of analyses, results from similar studies, and other relevant evidence | 10-12 |
| Generalisability         | 21 | Discuss the generalisability (external validity) of the study results                                                                                                      |       |
| <b>Other information</b> |    |                                                                                                                                                                            |       |
| Funding                  | 22 | Give the source of funding and the role of the funders for the present study and, if applicable, for the original study on which the present article is based              | 17    |

\*Give information separately for exposed and unexposed groups.

**Note:** An Explanation and Elaboration article discusses each checklist item and gives methodological background and published examples of transparent reporting. The STROBE checklist is best used in conjunction with this article (freely available on the Web sites of PLoS Medicine at <http://www.plosmedicine.org/>, Annals of Internal Medicine at <http://www.annals.org/>, and Epidemiology at <http://www.epidem.com/>). Information on the STROBE Initiative is available at [www.strobe-statement.org](http://www.strobe-statement.org).



# BMJ Open

## An Exploratory Spatial Analysis of Overweight and Obesity among Children and Adolescents in Shandong, China

|                                 |                                                                                                                                                                                                                                                                                                                                                                                                                                          |
|---------------------------------|------------------------------------------------------------------------------------------------------------------------------------------------------------------------------------------------------------------------------------------------------------------------------------------------------------------------------------------------------------------------------------------------------------------------------------------|
| Journal:                        | <i>BMJ Open</i>                                                                                                                                                                                                                                                                                                                                                                                                                          |
| Manuscript ID                   | bmjopen-2018-028152.R2                                                                                                                                                                                                                                                                                                                                                                                                                   |
| Article Type:                   | Research                                                                                                                                                                                                                                                                                                                                                                                                                                 |
| Date Submitted by the Author:   | 13-Jun-2019                                                                                                                                                                                                                                                                                                                                                                                                                              |
| Complete List of Authors:       | Qin, Wenzhe; Shandong University, School of Public Health<br>Wang, Lu; Shandong Province Health and Family Planning Commission, Shandong Provincial Medical Examination Office<br>Xu, Lingzhong; Shandong University<br>Sun, Long; Shandong University, School of public health<br>Li, Jiajia; Shandong University, School of Public Health<br>Zhang, Jiao; Shandong University, School of Public Health<br>Shao, Hui; Tulane University |
| <b>Primary Subject Heading</b>: | Public health                                                                                                                                                                                                                                                                                                                                                                                                                            |
| Secondary Subject Heading:      | Public health                                                                                                                                                                                                                                                                                                                                                                                                                            |
| Keywords:                       | Overweight, Obesity, Child and adolescent, Spatial analysis, Geographic location                                                                                                                                                                                                                                                                                                                                                         |
|                                 |                                                                                                                                                                                                                                                                                                                                                                                                                                          |

SCHOLARONE™  
Manuscripts

## Title Page

An Exploratory Spatial Analysis of Overweight and Obesity among Children and  
Adolescents in Shandong, China

Wenzhe Qin<sup>a#</sup>; Lu Wang<sup>b#</sup>; Lingzhong Xu<sup>a</sup>; Long Sun<sup>a</sup>; Jiajia Li<sup>a</sup>, Jiao Zhang<sup>a</sup>; Hui  
Shao<sup>c</sup>

- a. Department of Social Medicine and Health Service Management, School of Public Health, Shandong University, Jinan, Shandong, PR China
- b. Shandong Provincial Medical Examination Office, Jinan, Shandong, PR China
- c. Department of Global Health Systems and Development School of Public Health and Tropical Medicine, Tulane University, New Orleans, LA, United States

#: Wenzhe Qin and Lu Wang contributed equally to this work.

**Corresponding author:** Lingzhong Xu, Professor

Department of Social Medicine and Health Management, School of Public Health, Shandong University Center for Health Economics Experiment and Public Policy Research; NHC Key Laboratory of Health Economics and Policy Research, Jinan, 250012, China.

Tel and fax: +86-0531-88382648. Email: [lzxu@sdu.edu.cn](mailto:lzxu@sdu.edu.cn)

Word count: 3700

## Abstract

**Objective:** Identifying the spatial patterns of childhood overweight/obesity (OW/OB) can help to guide resource allocation for preventive intervention in China. This study aims to estimate rates of childhood OW/OB across counties within Shandong Province, using geographic techniques to identify sex-specific spatial patterns of childhood OW/OB as well as the presence of spatial clusters.

**Design:** Cross-sectional study.

**Setting:** Shandong Province in China.

*Participants and Methods:* Data on 6,216,076 children and adolescents aged 7-18 years from the Primary and Secondary Schoolchildren Physical Examination Database for Shandong Province were used in this study. Spatial patterns of sex-specific prevalence of childhood OW/OB were mapped. Global autocorrelation statistic (Moran's I) and the Local Indicator of Spatial Association (LISA) were applied to assess the degree of spatial autocorrelation.

**Results:** The overall prevalence of childhood OW/OB in Shandong province were 15.05% and 9.23% respectively. Maps of the sex-specific prevalence of OW/OB demonstrate a marked geographical variation of childhood OW/OB in different regions. Prevalence of childhood OW/OB had a significant positive spatial autocorrelation among both boys and girls. LISA analysis identified significant clusters (or 'hot spots') of childhood OW/OB in the eastern coastal region, central region, and southwestern region.

**Conclusions:** The prevalence of childhood OW/OB is highly spatially clustered. Geographically focused appropriate intervention should be introduced in current childhood OW/OB prevention and control strategy.

**Keywords:** Overweight; Obesity; Child and adolescent; Spatial analysis; Geographic location

### Strengths and limitations of this study

- With a large sample size, this study is a secondary analysis of census database of primary and secondary schoolchildren aged 7-18 years old in publicly

maintained schools in Shandong Province.

- Geographic techniques to identify sex-specific spatial patterns of childhood OW/OB as well as the presence of spatial clusters.
- This study provided information on the role that place might play in the health status and the prevention of disease, and improving interventions and health-related policies based on spatial heterogeneity.
- The absence of detailed information at the individual level limited research on the determinants of OW/OB on targeted clustered areas.
- As a cross-sectional study, the temporal and spatial trends of OW/OB cannot be verified.

## Introduction

Childhood obesity is one of the most serious public health challenges in the 21st century.<sup>1</sup> The prevalence of overweight and obesity (OW/OB) among children and adolescent has been rising rapidly in many developed countries and is affecting many low-and-middle-income countries.<sup>2-5</sup> With rapid economic development over the past decades, China has also witnessed an increase in the prevalence of childhood obesity.<sup>6,7</sup> In 2013, approximately 23.0% and 14.0% of Chinese boys and girls aged 2–19 years were overweight or obese.<sup>8</sup> Overweight and obese children are more likely to stay obese into adulthood, and develop non-communicable diseases (NCDs) like diabetes and cardiovascular diseases at a younger age.<sup>9-11</sup> Even worse, childhood obesity is associated with a higher chance of premature death and disability in adulthood.<sup>12</sup>

Given its high prevalence and severe impact on health outcomes, researchers had poured attention into the modifiable determinants and driving factors of childhood OW/OB. Several studies have found that childhood OW/OB is multifactorial and complex and is considered to result when various genetic, behavioral, environmental, physiological, social and cultural factors interact.<sup>13-16</sup> It is increasingly recognized that where we live has an impact on our health. For example, the term “built environment” mainly determined leisure-time physical activity through the availability of parks,

1  
2  
3  
4 playgrounds or sports clubs, road traffic, and transportation systems, and influenced  
5 dietary behavior by spatial accessibility to food through the patterns of food outlets and  
6 restaurants.<sup>17</sup> Changes in the lived in and the built environment have been connected to  
7 the rise of obesity.<sup>18,19</sup> However, the geographical relevance between adjacent regions,  
8 especially in terms of lifestyle and social factors, were often neglected in current studies  
9 in Chinese schoolchildren. Considering the fact that the prevalence of OW/OB at one  
10 health region are likely to be correlated with prevalence in nearby regions, ignoring the  
11 clustering effect could potentially lead to biased estimation.<sup>20</sup>  
12  
13  
14  
15  
16  
17  
18  
19  
20

21 Geographic Information System (GIS) is a potentially 'powerful evidence-based  
22 practice tool' in community health, as they enable the identification of spatial  
23 epidemiology or the incidence of disease and can allow for effective allocation of  
24 resource in a spatial setting.<sup>21</sup> GIS has been employed in several innovative studies of  
25 OW/OB. For example, to explore regional variations and spatial clustering of obesity  
26 rates; to identify locations for targeted obesity intervention efforts.<sup>16,18,22-24</sup> In addition,  
27 most of the previous analysis was conducted using large geographical units such as  
28 provincial or city level, making it difficult to provide effective implementation of local  
29 policies or decisions for obesity prevention. Selecting the most appropriate scale or the  
30 smaller geographical areas (i.e., counties) makes the obesity interventions more  
31 targeted.  
32  
33  
34  
35  
36  
37  
38  
39  
40  
41  
42  
43  
44

45 Shandong Province is an important littoral province in East China with a population of  
46 99.46 million in 2016, and covers an area of 156,700 square kilometers. It includes 140  
47 counties belonging to 17 administration regions (Figure1). The prevalence of childhood  
48 obesity in Shandong Province in 2010 reached 15.83% and 7.12% among boys and girls,  
49 respectively.<sup>25</sup> In addition, the report of Primary and Secondary Schoolchildren  
50 Physical Examination in Shandong province in 2015 showed that the overall  
51 overweight and obesity rates of children and adolescent were 30.8% and 12.8%,  
52 respectively.<sup>26</sup> The childhood OW/OB rates in Shandong province grew rapidly which  
53  
54  
55  
56  
57  
58  
59  
60

1  
2  
3  
4 has caught up the prevalence of childhood OW/OB in developed countries.<sup>27</sup>  
5  
6

7 Hence, the present study aimed to estimate rates of childhood OW/OB at the county  
8 level and apply geographic techniques to examine the spatial patterns of childhood  
9 OW/OB by gender, in particular to identify spatial cluster of areas with higher rates of  
10 childhood OW/OB.  
11  
12  
13  
14  
15  
16  
17

## 18 **Methods**

### 19 **Data sources and study design**

20 This study comprised a cross-sectional secondary data analysis of the spatial  
21 distribution of childhood OW/OB, using data from Primary and Secondary  
22 Schoolchildren Physical Examination Database of Shandong Province. This database  
23 contains schoolchildren aged 7-18 years old from all public primary and secondary  
24 schools and vocational schools in 2017.  
25  
26  
27  
28  
29  
30  
31  
32  
33

34 Shandong Province began to conduct health checkups for primary and secondary  
35 schoolchildren in 2009 according to the requirements of the National Health  
36 Commission of China, and apply free health checkup for them every year. Primary and  
37 Secondary Schoolchildren Physical Examination is organized by the Health  
38 Commission of Shandong Province (The author Wang Lu is one of the leaders of the  
39 investigation team). The contents of the medical examination mainly include medicine  
40 and surgery, ophthalmology, stomatology, physical indicators, and physiological  
41 function indicators. The specific process is as follows. Before the physical examination,  
42 the Health Commission of Shandong Province selected and published the declared  
43 medical and health institutions. According to the published list of medical institutions,  
44 educational institutions select the nearest institution to enter schools for health  
45 examination of students. All measurements were performed by well-trained health  
46 professionals in each medical institution using the same type of apparatus and followed  
47 the same procedures and the uniform date. During the period of physical examination,  
48  
49  
50  
51  
52  
53  
54  
55  
56  
57  
58  
59  
60

1  
2  
3  
4 a special supervision team went to each physical examination site to conduct quality  
5 inspections. After the physical examination, the medical institutions responsible for the  
6 physical examination directly input the physical examination data into the Primary and  
7 Secondary Schoolchildren Physical Examination Database of Shandong Province.  
8  
9 After the data entry, the expert working group will conduct a random sampling checkup  
10 of all the entered physical examination data to ensure the data quality.  
11  
12  
13  
14  
15  
16

17 The physical examination was conducted by medical staffs from 1,373 medical  
18 institutions in the whole province. The physical examination rate was 93.96%, and data  
19 reporting rate was 100%. All schoolchildren voluntarily joined this study, and both  
20 schoolchildren and their parents/guardians were provided written informed consent. We  
21 extracted individual information of schoolchildren and adolescent, including codes of  
22 administrative divisions, age, gender, and measure of height and weight. Body mass  
23 index (BMI) was calculated (Weight in kilograms divided by height in meters squared:  
24  $\text{kg/m}^2$ ). Childhood OW/OB was defined according to the classification reference in  
25 different age and gender of the Working Group for Obesity in China (WGOC), the cut-  
26 off points of which are 85th and 95th percentiles of BMI, respectively (Overweight:  
27  $85\text{th percentile} \leq \text{BMI} < 95\text{th percentile}$ ; Obesity:  $\text{BMI} \geq 95\text{th percentile}$ ).<sup>28</sup> Using  
28 demographic data from the 2010 census as the standard population, we estimated age-  
29 standardized rates of OW/OB for schoolchildren and adolescents aged 7-18 years older  
30 at the county level. The age-standardized rate is a value that represents the ratio of  
31 observed incidence of disease to the expected incidence of disease, whereas a value of  
32 zero indicates an area with no observed overweight and obese cases.  
33  
34  
35  
36  
37  
38  
39  
40  
41  
42  
43  
44  
45  
46  
47  
48  
49

50 This study included 140 counties (city districts, county-level cities, and counties, often  
51 referred to here as “counties”) of Shandong Province as spatial units. In practice, county  
52 is a basic unit of the administrative region in China and is also the registered permanent  
53 residence of the schoolchildren, which implements the national policies toward  
54 population health and health promotion directly. In addition, China's unique household  
55 registration system and student roll management system stipulates that primary school  
56  
57  
58  
59  
60

and secondary school must be completed in the household registration area, that is, in the county. Primary and junior middle school admission is according to the admission dicing system based on the proximity principle. There is no big difference between the school districts and residence districts. Although few high school students need to go to school far away from their residential areas, these students are difficult to distinguish. This study included 'county' as spatial units, both the school district and the residential area are in one county. This greatly avoids the difference in childhood obesity rates due to differences between school districts and residential areas.

### Statistical analysis

A two-part analysis was conducted: firstly, the spatial distribution of age-standardized OW/OB rates was mapped for boys and girls. Following this, the second part focused on two aspects of the spatial clustering: the overall 'global' spatial clustering in the prevalence of OW/OB and the 'local' patterns of OW/OB.

Global Moran's  $I$  statistic is a measure of global spatial autocorrelation, a value representing the similarity in OW/OB rates between neighboring regions, and the mathematical definition of Moran's  $I$  is as follows.<sup>29,30</sup>

$$\text{Moran's } I = \frac{N \sum_{i=1}^N \sum_{j=1}^N W_{ij} (x_i - \bar{x})(x_j - \bar{x})}{\left( \sum_{i=1}^N \sum_{j=1}^N W_{ij} \right) \sum_{i=1}^N (x_i - \bar{x})^2} \quad (i \neq j)$$

Where  $W_{ij}$  is the spatial weights assigned to pairs of units (i.e. counties) between observations  $i$  and  $j$ ,  $N$  is equal to the total number of pixels.

The Moran's  $I$  statistic ranges from +1 (for positive spatial autocorrelation where high values are proximal to other high values or low values adjacent to low values, i.e., clustering) to -1 (for negative autocorrelation where high values tend to be near low values, i.e., dispersion). A statistically significant ( $Z$  score  $\geq 1.96$ ,  $P$  value  $< 0.05$ ) estimate of Moran's  $I$  indicates that neighboring counties have a similar prevalence rate of OW/OB and the cases are likely to cluster at the county level. Nonsignificant values indicate no spatial autocorrelation or that the data are randomly distributed within the



1  
2  
3  
4 study's geographical boundaries. In the present analysis, neighbors were defined using  
5 rooks case adjacency, which considers that all regions with common borders are  
6 neighbors.  
7  
8  
9

10  
11 Moran's *I* statistic is a global test that does not identify where the clusters are located  
12 or what type of spatial autocorrelation is occurring (e.g., high-high cluster or low-low  
13 cluster, etc.). To evaluate the existence of local clusters, it is necessary to use local  
14 statistics. The local indicator of spatial autocorrelation (LISA) was, therefore applied  
15 as an indicator of local spatial association.<sup>20</sup> The local spatial autocorrelation  
16 decomposes the global measurement into the contributions for each geographic region,  
17 detecting homogeneity or heterogeneity in values around a given observation or used  
18 as diagnostics for outliers in global patterns. The LISA measures whether, for each  
19 health region, the standardized rate of OW/OB is closer to the values of its neighbors'.  
20 Inverse distance weighting squared is again used to conceptualize the spatial  
21 relationships. To ensure excellent statistical power and consider the computation times,  
22 999 Monte Carlo replications were set, and clusters with statistical significance of  
23  $P < 0.05$  were reported.  
24  
25  
26  
27  
28  
29  
30  
31  
32  
33  
34  
35  
36  
37  
38

39 Cluster maps were created using the results of statistical testing to illustrate the local  
40 spatial patterns of significant positive and significant negative local spatial  
41 autocorrelation. The local spatial autocorrelation analysis results in five categories of  
42 health regions: (i) 'high-high' indicates clustering of high values of age-standardized  
43 OW/OB rates (positive LISA value), (ii) 'low-high' indicates that low values are  
44 surrounded by high values of age-standardized OW/OB rates (negative LISA value),  
45 (iii) 'low-low' indicates clustering of low values of age-standardized OW/OB rates  
46 (positive LISA value), (iv) 'high-low' indicates that high values are surrounded by low  
47 values of age-standardized OW/OB rates (negative LISA value), and (v) 'not significant'  
48 indicates that there is no spatial autocorrelation. All analyses were conducted using  
49 GeoDA<sup>31</sup> and ArcGIS 10.3. The geography files were provided by the National  
50 Administration of Surveying, Mapping, and Geo-information of China (NASG), the  
51  
52  
53  
54  
55  
56  
57  
58  
59  
60

1  
2  
3  
4 administrative organization in charge of surveying and mapping undertaking across  
5  
6 China.

### 7 **Patient and public involvement**

8  
9 No patients or public were involved in this study.

## 11 **Results**

### 13 **Participants**

14  
15 After data cleaning, 6,216,076 qualified schoolchildren aged 7-18 years were finally  
16  
17 included for analysis. Participating children were primarily Han ethnicity (>80%) and  
18  
19 were approximately equally distributed across sex (50.57% girls) with a mean (SD) age  
20  
21 of 10.94(2.62) years.

### 23 **Prevalence of overweight and obesity**

24  
25 In Shandong province, the overall age-standardized rate of OW/OB was 15.05% and  
26  
27 9.23% respectively, which were higher than the national average rates of 5.45% and  
28  
29 2.83%. Also, the rate of overweight was 17.40% for boys and 12.73% for girls; the rate  
30  
31 of obesity was 10.49% for boys and 7.97% for girls. The age-standardized rate of  
32  
33 OW/OB in the county level was higher in boys than girls ( $\chi^2=30.44$ ,  $P<0.001$ ).

34  
35  
36  
37 Age-standardized rates of overweight differed substantially across health regions  
38  
39 ranging from 9.3% in Qihe, Dezhou to 24.94% in Penglai, Yantai for boys and from  
40  
41 8.19% in Linshu, Linyi to 19.15% in Longkou, Yantai for girls. Obesity rates varied  
42  
43 substantially across health regions: from 3.59% in Changle, Weifang to 20.26% in  
44  
45 Central District in Jining for boys and 3.45% in Zhanhua, Liaocheng to 13.5% in  
46  
47 Central District in Jining for girls. Age-standardized rates were also mapped by gender  
48  
49 at the county level and then classified by the rates (Figure2 and Figure 3).

### 51 **Spatial autocorrelation and cluster identification**

52  
53  
54 Based on the aforementioned, there was a marked geographical variation of children  
55  
56 overweight/obesity in different regions indicating potential presence of spatial clusters  
57  
58 or spatial heterogeneity. The Moran's I statistic was applied to test the overall spatial  
59  
60

clustering. The results showed that there are significant positive spatial autocorrelations in the data. In particular, the Moran's I statistic of age-standardized overweight rates was 0.3736 (p-value=0.001) for boys and 0.3370 for girls (p-value=0.001). In addition, the Moran's I statistic of age-standardized obesity rates was 0.2312 (p-value=0.001) for boys and 0.1575 (p-value=0.006) for girls. The level of spatial autocorrelation across health regions for age-standardized OW/OB rates were slightly higher in boys than girls. For both sexes, the Moran's I statistic and corresponding p-values all suggest non-randomness in the overall spatial pattern of the age-standardized rates of overweight and obesity in Shandong province. Table 1 illustrates spatial correlation statistics and corresponding p-values as estimated by the Moran's I statistic.

Table 1 Spatial autocorrelation of age-standardized overweight/obesity rates in Shandong Province

|            | Moran's I | Z value | P value |
|------------|-----------|---------|---------|
| Overweight |           |         |         |
| Boys       | 0.3736    | 7.1726  | 0.001** |
| Girls      | 0.3370    | 6.1104  | 0.001** |
| Both sexes | 0.2704    | 5.1601  | 0.001** |
| Obesity    |           |         |         |
| Boys       | 0.2312    | 4.4350  | 0.001** |
| Girls      | 0.1575    | 3.0727  | 0.006** |
| Both sexes | 0.1130    | 2.2082  | 0.014*  |

Note: \*\*P<0.01; \*P<0.05.

We applied LISA to explore more information on the type and location of clustering. County-level LISA significant clusters were observed for both OW/OB (Fig.4 and Fig.5). For overweight boys, two larger hot spots (HH) was detected in the most counties of Yantai in eastern coastal region and Jining in the southwest, and one smaller hot spot (HH) was found in Jinan in the central province. Two large cool spots (LL) were observed in the eastern and northwestern regions of Shandong province, and one smaller LL was found in a county in southwest. For the girls, the hot spot was comprised of the most counties in Yantai and two districts in Jinan and two counties in Jining. Two large cool spots were detected in the eastern regions (Fig.4). However, the pattern of clusters for obesity was different compared to that of overweight (Fig.5). For boys, the hot spot mainly distributed in the central region, and a small hot spot was detected

1  
2  
3  
4 in Qingdao in the eastern coastal region. For girls, three hot spots were detected in  
5 Weihai in the eastern coastal region, and in Jinan and Zibo in the central region, and  
6 Jining in the southwest. Also, several counties showed a dispersed pattern of the cluster  
7 (HL or LH) as displayed in Fig. 4 and Fig.5.  
8  
9  
10

## 11 12 13 14 **Discussions**

15  
16 The present study illustrates the marked variability of OW/OB prevalence in Shandong  
17 province at the gender and health region level. The results also indicated that the age-  
18 standardized rate of both overweight and obesity among boys was higher compared to  
19 girls. Our spatial analysis showed the presence of spatial heterogeneity using a  
20 significant positive spatial autocorrelation identified by Moran's I statistic for both boys  
21 and girls as well as the significant local clusters identified by LISA across the province.  
22  
23  
24  
25  
26  
27  
28  
29

30 The first concern is the Primary and Secondary Schoolchildren Physical Examination  
31 Database of Shandong Province. The census of physical examination for primary and  
32 secondary schoolchildren began in Shandong Province in 2009 and examined the  
33 physical condition of primary and secondary schoolchildren every year. With a census  
34 dataset, the physical health of every student can be mastered in addition to provide  
35 evidence for understanding the overall health of students. Several types of research have  
36 explored childhood health with the data from the National Surveys on Chinese Students'  
37 Constitution and Health in Shandong Province. The survey is conducted every five  
38 years, and the data is obtained by sampling method, and the existence of sampling errors  
39 makes the data less stable. Although the census design increases the accuracy and  
40 stability of the data, the absence of other information at the individual level limited  
41 research on the factors of schoolchildren's health, such as socioeconomic factors,  
42 parental background, and psychological status.  
43  
44  
45  
46  
47  
48  
49  
50  
51  
52  
53  
54  
55

56  
57 The difference in OW/OB between boys and girls is consistent with results from  
58 previous studies in Shandong and throughout China.<sup>32,33</sup> Differences in age structure  
59  
60

1  
2  
3  
4 cannot explain this finding, as data have been age-standardized. Instead, in addition to  
5 the possible biologic/genetic factors, behavioral factors, family environment and  
6 psychological factors (e.g., body image perceptions) are also related to OW/OB in  
7 children. On a behavioral level, girls report being more attentive to food and its effects  
8 on health and weight control.<sup>34</sup> A study reported that consumption of foods and  
9 beverages outside three main meals and potato chips were more popular in boys than  
10 in girls.<sup>35</sup> Moreover, a review of studies found that boys are also higher users of TV  
11 and video games than girls, and these sedentary behaviors have also been associated  
12 with body composition and BMI.<sup>36</sup> There is some evidence that misconceptions about  
13 a child's weight status were prevalent among parents and grandparents, and boys'  
14 weight status was more frequently underestimated than girls.<sup>37</sup> On a psychological level  
15 related to body image, girls self-perceive as overweight more often than do boys.<sup>38</sup>

16  
17  
18  
19  
20  
21  
22  
23  
24  
25  
26  
27  
28  
29 The global spatial autocorrelation demonstrates that there is significant positive spatial  
30 autocorrelation in the data, which showed higher levels of correlation in similar  
31 OW/OB rates between neighboring counties in the whole province. The spatial patterns  
32 of OW/OB might be explained by some possible reasons for neighborhood  
33 characteristics. First, neighboring county residents may share similar socio-economic  
34 backgrounds; a well-established correlate to obesity.<sup>39</sup> Second, as residents in  
35 neighboring areas are likely to share similar lifestyles about diet, nutritional habits, and  
36 physical activity, it could be that residents of adjacent areas with similar obesity rates,  
37 share behaviors that promote this condition.<sup>18</sup> Moreover, adjacent areas also share  
38 similar social and built characteristics and therefore the clustered areas may also share  
39 similar features. It is worth noting that racial/ethnic differences might also be a possible  
40 reason. A previous study has shown that living in neighborhoods with a higher  
41 proportion of foreign-born residents is associated with reduced child obesity risk.<sup>40</sup>  
42 Further research would be necessary to tease out the actual mechanism driving the  
43 gradient in OW/OB in these areas. In addition, prospective cohort studies and  
44 experimental studies were needed to explore the long-term effects of neighborhood  
45 environment directly to the development of obesity.

1  
2  
3  
4  
5  
6 The LISA found also that the hot spots (HH) were detected in Yantai of the eastern  
7 coastal region, Jinan in the central region and Jining in the southwestern inland region  
8 among both boys and girls. Again, the cold spots (LL) and other dispersed patterns of  
9 the cluster (HL or LH) were observed. Some potential explanations for the different  
10 type of clusters are as follows. First, the regional SES might be the influenced factor  
11 responsible for the geographic differences in the prevalence of childhood obesity. Some  
12 previous studies had confirmed that the regional SES affected to the distribution of  
13 OW/OB positively in China, in other words, high SES youths are more likely to be  
14 OW/OB than other lower SES counterparts.<sup>41</sup> The evidence provided by research  
15 indicated that OW/OB prevalence was greater and increased more quickly in the coastal  
16 counterparts.<sup>7</sup> Eastern coastal region has high SES with a more developed economy,  
17 the living standards, nutritional conditions, and public health are better than other SES  
18 districts. Secondly, with the fast-growing Chinese economy, the rapid urbanization has  
19 narrowed the disparity between coastal and inland counterparts and became a potential  
20 contributor that cannot be ignored.<sup>42,43</sup> That is the reason why the hot spot of OW/OB  
21 for children also occurred in the inland region. In addition to the aforementioned factors,  
22 the traditional Chinese diet is shifting toward a diet with high fat, high energy density  
23 and low dietary fiber on the whole, changes which have resulted in rapid increases in  
24 the prevalence of OW/OB.<sup>44</sup> Moreover, television viewing or surf the Internet besides  
25 reducing physical activity also leads to increased consumption of energy-rich foods  
26 through incessant commercial advertisement.<sup>45</sup> These factors lead to a rapid increase in  
27 the prevalence of overweight and obesity among children and adolescent.

28  
29  
30  
31  
32  
33  
34  
35  
36  
37  
38  
39  
40  
41  
42  
43  
44  
45  
46  
47  
48  
49  
50 The strength of this study is that the data comes from the Primary and Secondary  
51 Schoolchildren Physical Examination Database with a large sample size in Shandong  
52 Province, China. Examination survey provided direct measurements of weight and  
53 height and avoided bias in self-reported data. The results are important for  
54 understanding the role that place might play in the health status and suggesting the  
55 importance of improving interventions and health-related policies that are thus far  
56  
57  
58  
59  
60

1  
2  
3  
4 mainly based on assumptions of spatial homogeneity. In addition, the findings verified  
5 the effectiveness of spatial data analysis methods and in particular the helpful means of  
6 cluster analysis for public health professionals and policymakers. For instance, based  
7 on the potential explanations for the identified clusters, existing policies and practices  
8 could provide funding for physical education as well as recreation centers in  
9 communities most in need. Furthermore, it may be advantageous from the perspective  
10 that exploring areas of low prevalence to ascertain which factors might decrease the  
11 risk of the population. Further research is required to explore the underlying mechanism  
12 for the increased levels of OW/OB on clustered areas, and investigate the impact of  
13 area-level characteristics on the spatial patterns identified.  
14  
15  
16  
17  
18  
19  
20  
21  
22  
23  
24

25 This study has several limitations. First, the absence of detailed information at the  
26 individual level limited research on the determinants of OW/OB on targeted clustered  
27 areas. Second, the study may also be affected by the modifiable areal unit problem. The  
28 spatial scale used is not unique and typically arbitrary and modifiable; the spatial  
29 patterns of OW/OB identified may change depending on different scales. Also, we only  
30 analyzed the data for one year, due to data availability, the temporal and spatial trends  
31 of OW/OB cannot be verified.  
32  
33  
34  
35  
36  
37  
38  
39  
40  
41  
42

## 43 **Conclusions**

44 A high prevalence of childhood OW/OB was observed in Shandong Province, one of  
45 the populous provinces in China. There were marked sex-specific regional differences  
46 in the prevalence of childhood OW/OB, along with a tendency of spatial correlation of  
47 the childhood OW/OB. In addition, the spatial clusters provide valuable information on  
48 the identification of local geographical variation and elevated risk of OW/OB in  
49 Shandong province. Therefore, prevention and health promotion interventions, as well  
50 as effective allocation of resources and services, should be implemented based on  
51 regional and population-specific demands. For the hot spots of childhood OW/OB,  
52 resource allocation is mainly concentrated in three aspects. First, through the health  
53  
54  
55  
56  
57  
58  
59  
60

1  
2  
3  
4 education of parents, they are encouraged to establish a healthy lifestyle, which in turn  
5 affects children's cognition and diet behavior; In addition, the schools should develop  
6 appropriate health strategies, including education on nutrition knowledge, increased  
7 physical activity, and encourage children to establish health behaviors; Furthermore,  
8 the government should provide more interventions for hot spots of childhood OW/OB,  
9 including developing dietary guidelines, increasing community exercise facilities, and  
10 conducting health education.  
11  
12  
13  
14  
15  
16

### 17 **Acknowledgment**

18  
19 We would like to thank Shandong University Center for Health Economics Experiment  
20 and Public Policy Research; NHC Key Laboratory of Health Economics and Policy  
21 Research (Shandong University) for the supports.  
22  
23  
24

### 25 **Reference**

- 26 1. WHO. Childhood overweight and obesity 2018. Available from:  
27 <http://www.who.int/dietphysicalactivity/childhood/en/>.
- 28 2. Ogden CL, Carroll MD, Kit BK, et al. Prevalence of Childhood and Adult Obesity in the  
29 United States, 2011-2012. *Jama*. 2014;311(8):806. <http://dx.doi.org/10.1001/jama.2014.732>
- 30 3. Stamatakis E, Wardle J, Cole TJ. Childhood obesity and overweight prevalence trends in  
31 England: evidence for growing socioeconomic disparities. *Int J Obes*. 2010;34(1):41-7.  
32 <http://dx.doi.org/10.1038/ijo.2009.217>
- 33 4. Abarca-Gómez L, Abdeen ZA, Hamid ZA, et al. Worldwide trends in body-mass index,  
34 underweight, overweight, and obesity from 1975 to 2016: a pooled analysis of 2416 population-  
35 based measurement studies in 128·9 million children, adolescents, and adults. *The Lancet*.  
36 2017;390(10113):2627-42. [https://doi.org/10.1016/S0140-6736\(17\)32129-3](https://doi.org/10.1016/S0140-6736(17)32129-3)
- 37 5. Cheng TO. Obesity in Chinese children. *J Roy Soc Med*. 2004;97(5):254.  
38 <http://dx.doi.org/10.1177/014107680409700519>
- 39 6. Ji CY. The prevalence of childhood overweight/obesity and the epidemic changes in 1985-  
40 2000 for Chinese school-age children and adolescents. *Obes Rev*. 2010;9(s1):78-81.  
41 <http://dx.doi.org/10.1111/j.1467-789X.2007.00443.x>
- 42 7. Ji CY, Cheng TO. Epidemic increase in overweight and obesity in Chinese children from  
43 1985 to 2005. *Int J Cardiol*. 2009;132(1):1-10. <http://dx.doi.org/10.1016/j.ijcard.2008.07.003>
- 44 8. Ng M, Fleming T, Robinson M, et al. Global, regional, and national prevalence of overweight  
45 and obesity in children and adults during 1980-2013: a systematic analysis for the Global Burden  
46 of Disease Study 2013. *The lancet*. 2014;384(9945):766-81. [https://dx.doi.org/10.1016%2FS0140-6736\(14\)60460-8](https://dx.doi.org/10.1016%2FS0140-6736(14)60460-8)
- 47 9. Wang Y, Lobstein T. Worldwide trends in childhood overweight and obesity. *Int J Pediatr*  
48 *Obes*. 2006;1(1):11-25. <https://doi.org/10.1080/1747716060058674>
- 49 10. Kelly AS, Barlow SE, Rao G, et al. Severe obesity in children and adolescents: identification,  
50 associated health risks, and treatment approaches: a scientific statement from the American Heart  
51 Association.  
52  
53  
54  
55  
56  
57  
58  
59  
60



- Association. *Circulation*. 2013;128:1689-712. <https://doi.org/10.1161/CIR.0b013e3182a5cfb3>
11. Bridger T. Childhood obesity and cardiovascular disease. *Paed Child Health*. 2009;14(3):177. <https://doi.org/10.1093/pch/14.3.177>
12. Peeters A, Barendregt JJ, Willekens F, et al. Obesity in adulthood and its consequences for life expectancy: a life-table analysis. *Ann Internl Med*. 2003;138(1):24-32. <https://doi.org/10.7326/0003-4819-138-1-200301070-00008>
13. Shan XY, Xi B, Cheng H, et al. Prevalence and behavioral risk factors of overweight and obesity among children aged 2–18 in Beijing, China. *Int J Pediatr Obes*. 2010;5(5):383-9. <https://doi.org/10.3109/17477160903572001>
14. Lin M, Pan L, Tang L, et al. Association of eating speed and energy intake of main meals with overweight in Chinese pre-school children. *Public Health Nutr*. 2014;17(9):2029-36. <https://doi.org/10.1017/S1368980013002176>
15. Song Y, Zhang X, Ma J, et al. Behavioral risk factors for overweight and obesity among Chinese primary and middle school students in 2010. *Zhonghua yu fang yi xue za zhi* [Chinese journal of preventive medicine]. 2012;46(9):789. (Article in Chinese)
16. Fang D, Thomsen MR, Nayga RM, et al. Association of Neighborhood Geographic Spatial Factors With Rates of Childhood Obesity. *JAMA Netw Open*. 2018;1(4):e180954-e. <https://doi.org/10.1001/jamanetworkopen.2018.0954>
17. Story M, Kaphingst KM, et al. Creating healthy food and eating environments: policy and environmental approaches. *Annu Rev Public Health*. 2008;29:253-72. <https://doi.org/10.1146/annurev.publhealth.29.020907.090926>
18. Paisi M. Obesity and Dental Caries in Children in Plymouth: University of Plymouth; 2017. <http://hdl.handle.net/10026.1/9582>
19. Casey R, Oppert J-M, Weber C, et al. Determinants of childhood obesity: what can we learn from built environment studies? *Food Qual Prefer*. 2014;31:164-72. <https://doi.org/10.1016/j.foodqual.2011.06.003>
20. Anselin L. Local indicators of spatial association—LISA. *Geogr Anal*. 1995;27(2):93-115. <https://doi.org/10.1111/j.1538-4632.1995.tb00338.x>
21. McLafferty SL. GIS and health care. *Annu Rev Public Health*. 2003;24(1):25-42. <https://doi.org/10.1146/annurev.publhealth.24.012902.141012>
22. Fraser LK, Clarke GP, Cade JE, et al. Fast food and obesity: a spatial analysis in a large United Kingdom population of children aged 13–15. *Am J Prev med*. 2012;42(5):e77-e85. <https://doi.org/10.1016/j.amepre.2012.02.007>
23. Poulou T, Elliott SJ. An exploratory spatial analysis of overweight and obesity in Canada. *Prev Med*. 2009;48(4):362-7. <https://doi.org/10.1016/j.ypmed.2009.01.017>
24. Hughey SM, Kaczynski AT, Porter DE, et al. Spatial clustering patterns of child weight status in a southeastern US county. *Appl Geogr*. 2018;99:12-21. <https://doi.org/10.1016/j.apgeog.2018.07.016>
25. Zhang YX, Wang SR. Secular trends in body mass index and the prevalence of overweight and obesity among children and adolescents in Shandong, China, from 1985 to 2010. *J Public Health*. 2011;34(1):131-7. <https://doi.org/10.1093/pubmed/fdr053>
26. Qi Y, Li N, Jia T, et al. Analysis on the relevant factors of obesity complicated with hypertension of overweight students from "health summer camp" of elementary and secondary schools in Shandong Province in 2015. *China Medical Herald*. 2016;13(36):89-92. (Article in

Chinese)

27. Wang Y, Lim H. The global childhood obesity epidemic and the association between socio-economic status and childhood obesity. *Int J Psychiatry*. 2012;24(3): 176-188.  
<https://doi.org/10.3109/09540261.2012.688195>
28. Group of China Obesity Task Force. Body mass index reference norm for screening overweight and obesity in Chinese children and adolescents. *Zhonghua liu xing bing xue za zhi*. 2004;25(2):97. (Article in Chinese)
29. Pfeiffer D, Robinson TP, Stevenson M, et al. Spatial analysis in epidemiology: Oxford University Press Oxford; 2008. <https://doi.org/10.1093/acprof:oso/9780198509882.001.0001>
30. Wheeler D, Shaw G, Barr S. Statistical techniques in geographical analysis: Routledge; 2013. <https://doi.org/10.4324/9780203821503>
31. Anselin L, Syabri I, Kho Y. GeoDa: An Introduction to Spatial Data Analysis. *Geogr Anal*. 2005;38(1):5-22. <https://doi.org/10.1111/j.0016-7363.2005.00671.x>
32. Zhang T, Li C, Lu M, et al. The prevalence of obesity and influence of early life and behavioral factors on obesity in Chinese children in Guangzhou. *Bmc Public Health*. 2016;16(1):954. <https://doi.org/10.1186/s12889-016-3599-3>
33. Guo X, Zheng L, Li Y, et al. Prevalence and risk factors of being overweight or obese among children and adolescents in northeast China. *Pediatr Res*. 2013;74(4):443-9.  
<https://doi.org/10.1038/pr.2013.116>
34. Wardle J, Haase AM, Steptoe A, et al. Gender differences in food choice: the contribution of health beliefs and dieting. *Ann Behav Med*. 2004;27(2):107-16.  
[https://doi.org/10.1207/s15324796abm2702\\_5](https://doi.org/10.1207/s15324796abm2702_5)
35. Li M, Dibley MJ, Sibbritt DW, et al. Dietary habits and overweight/obesity in adolescents in Xi'an City, China. *Asia Pac J Clin Nutr*. 2010;19(1):76-82.  
<http://dx.doi.org/10.6133%2fapjcn.2010.19.1.10>
36. Marshall SJ, Gorely T, Biddle SJ. A descriptive epidemiology of screen-based media use in youth: a review and critique. *J Adolesc*. 2006;29(3):333-49.  
<https://doi.org/10.1016/j.adolescence.2005.08.016>
37. Li J, Lei J, Wen S, et al. Sex disparity and perception of obesity/overweight by parents and grandparents. *Paediatr Child Health*. 2014;19(7):e113-e6. <https://doi.org/10.1093/pch/19.7.e113>
38. O'dea JA. Gender, ethnicity, culture and social class influences on childhood obesity among Australian schoolchildren: implications for treatment, prevention and community education. *Health Soc Care Community*. 2008;16(3):282-90.  
<https://doi.org/10.1111/j.1365-2524.2008.00768.x>
39. Penney T, Rainham D, Dummer T, et al. A spatial analysis of community level overweight and obesity. *Hum Nutr Appl Nutr*. 2014;27:65-74. <https://doi.org/10.1111/jhn.12055>
40. Kimbro RT, Denney JT. Neighborhood context and racial/ethnic differences in young children's obesity: structural barriers to interventions. *Soc Sci Med*. 2013;95:97-105.  
<https://doi.org/10.1016/j.socscimed.2012.09.032>
41. Zhang YX, Wang SR. Differences in development and the prevalence of obesity among children and adolescents in different socioeconomic status districts in Shandong, China. *Ann Hum Biol*. 2012;39(4):290-6. <https://doi.org/10.3109/03014460.2012.690888>
42. Contaldo F, Mazzarella G, Santarpia L, et al. Influence of urbanization on childhood obesity. *Nutr Metab Cardiovasc*. 2015;25(6):615-6. <https://doi.org/10.1016/j.numecd.2015.03.002>

- 1  
2  
3  
4  
5  
6  
7  
8  
9  
10  
11  
12  
13  
14  
15  
16  
17  
18  
19  
20  
21  
22  
23  
24  
25  
26  
27  
28  
29  
30  
31  
32  
33  
34  
35  
36  
37  
38  
39  
40  
41  
42  
43  
44  
45  
46  
47  
48  
49  
50  
51  
52  
53  
54  
55  
56  
57  
58  
59  
60
43. Zhang YX, Zhao JS, Chu ZH. Prevalence of overweight and obesity among children and adolescents is associated with urbanization in Shandong, China. *Int J Cardiol.* 2014;176(3):1212-3. <https://doi.org/10.1016/j.ijcard.2014.07.222>
44. Du S, Lü B, Wang Z, et al. Transition of dietary pattern in China. *Journal of hygiene research.* 2001;30(4):221-5. (Article in Chinese)
45. Matheson DM, Killen JD, Wang Y, et al. Children's food consumption during television viewing. *Am J Clin Nutr.* 2004;79(6):1088-94. <https://doi.org/10.1093/ajcn/79.6.1088>

## Footnotes

**Contributors:** Wenzhe Qin planned the study, conducted the analysis and wrote the paper while being supervised by Lingzhong Xu\*; Lu Wang, Jiajia Li, Long Sun helped to plan the study, including the instrumentation, and to revise the manuscript; Jiao Zhang and Hui Shao accomplished the statistical analysis and contributed to revising the paper. All authors contributed to the discussion of the paper, read and approved the final manuscript.

**Funding:** This project was funded by the National Natural Science Foundation of China (grant number 71673169 and 71673170)

**Competing interests:** None declared.

**Patient consent for publication:** Obtained.

**Ethics approval:** This study was approved by the Academic Research Ethics Committee of Shandong University.

**Provenance and peer review:** Not commissioned; externally peer reviewed.

**Data sharing statement:** No additional unpublished data.

Figure legends: Figure 1. Location of the study area in Shandong Province, China (The map has obtained permission from National Administration of Surveying, Mapping and Geoinformation of China (NASG))

Figure 2. Age-standardized overweight rates for boys and girls by county level in Shandong province (The map has obtained permission from National Administration of Surveying, Mapping and Geoinformation of China (NASG))

Figure 3. Age-standardized obesity rates for boys and girls by county level in Shandong province (The map has obtained permission from National Administration of Surveying, Mapping and Geoinformation of China (NASG))

Figure 4. LISA cluster maps for age-standardized overweight rates by county level in Shandong Province (The map has obtained permission from National Administration of Surveying, Mapping and Geoinformation of China (NASG))

1  
2  
3 Figure 5. LISA cluster maps for age-standardized obesity rates by county level in  
4 Shandong Province (The map has obtained permission from National Administration  
5 of Surveying, Mapping and Geoinformation of China (NASG))  
6  
7  
8  
9  
10  
11  
12  
13  
14  
15  
16  
17  
18  
19  
20  
21  
22  
23  
24  
25  
26  
27  
28  
29  
30  
31  
32  
33  
34  
35  
36  
37  
38  
39  
40  
41  
42  
43  
44  
45  
46  
47  
48  
49  
50  
51  
52  
53  
54  
55  
56  
57  
58  
59  
60

For peer review only

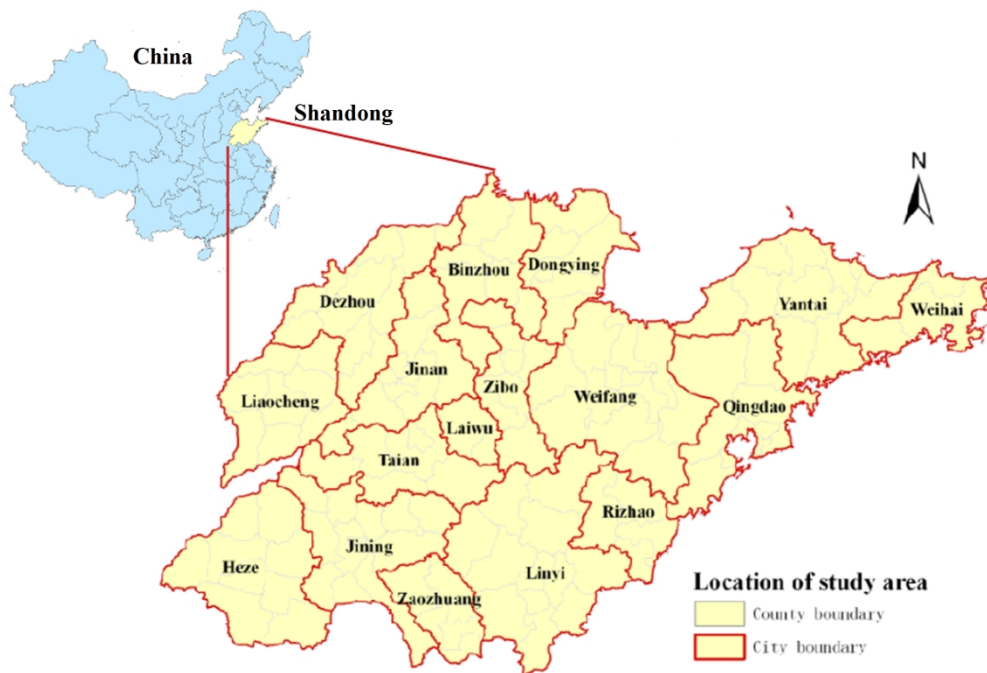

Figure 1. Location of study area in Shandong Province, China(The map has obtained permission from National Administration of Surveying, Mapping and Geoinformation of China (NASG))

174x118mm (300 x 300 DPI)

1  
2  
3  
4  
5  
6  
7  
8  
9  
10  
11  
12  
13  
14  
15  
16  
17  
18  
19  
20  
21  
22  
23  
24  
25  
26  
27  
28  
29  
30  
31  
32  
33  
34  
35  
36  
37  
38  
39  
40  
41  
42  
43  
44  
45  
46  
47  
48  
49  
50  
51  
52  
53  
54  
55  
56  
57  
58  
59  
60

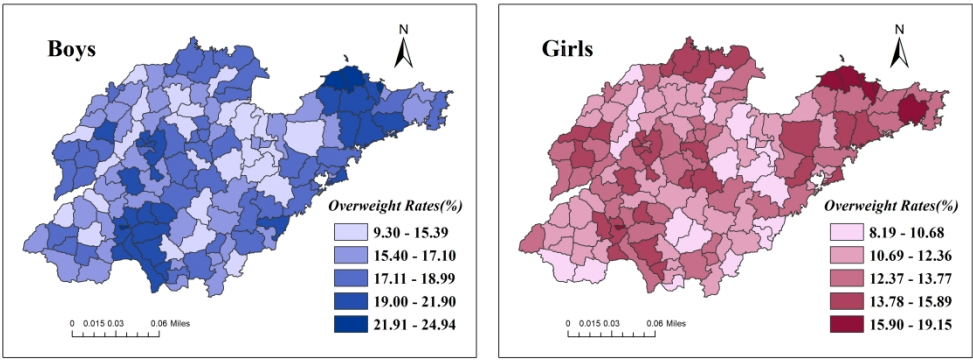

Figure 2. Age-standardized overweight rates for boys and girls by county level in Shandong province (The map has obtained permission from National Administration of Surveying, Mapping and Geoinformation of China (NASG))

411x159mm (300 x 300 DPI)

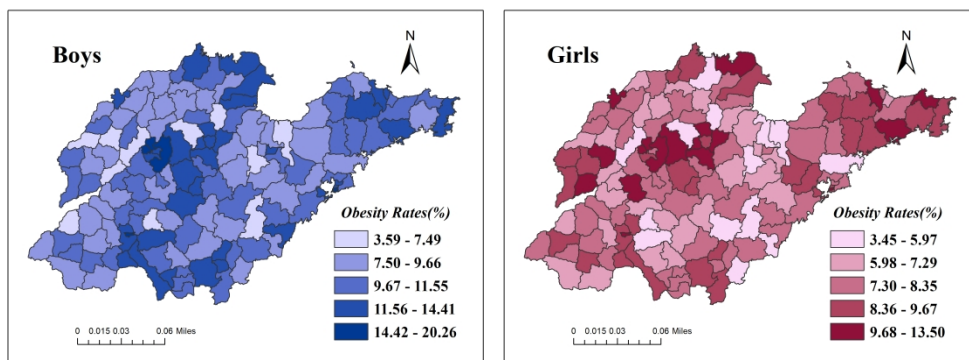

Figure 3. Age-standardized obesity rates for boys and girls by county level in Shandong province(The map has obtained permission from National Administration of Surveying, Mapping and Geoinformation of China (NASG))

409x157mm (300 x 300 DPI)

1  
2  
3  
4  
5  
6  
7  
8  
9  
10  
11  
12  
13  
14  
15  
16  
17  
18  
19  
20  
21  
22  
23  
24  
25  
26  
27  
28  
29  
30  
31  
32  
33  
34  
35  
36  
37  
38  
39  
40  
41  
42  
43  
44  
45  
46  
47  
48  
49  
50  
51  
52  
53  
54  
55  
56  
57  
58  
59  
60

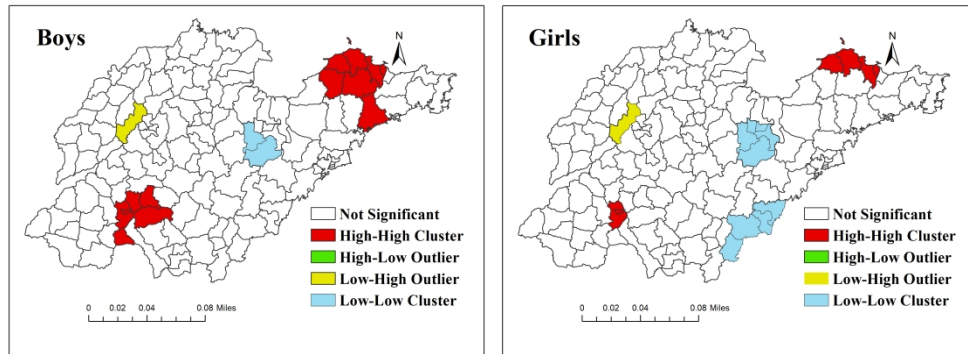

Figure 4. LISA cluster maps for age-standardized overweight rates by county level in Shandong Province(The map has obtained permission from National Administration of Surveying, Mapping and Geoinformation of China (NASG))

409x154mm (300 x 300 DPI)



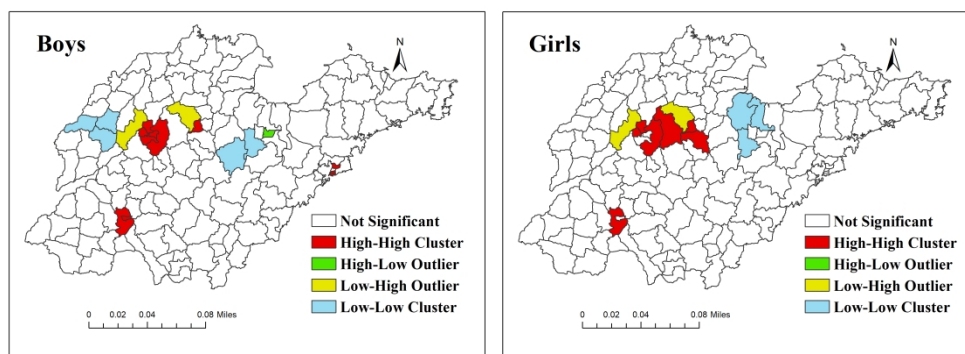

Figure 5. LISA cluster maps for age-standardized obesity rates by county level in Shandong Province(The map has obtained permission from National Administration of Surveying, Mapping and Geoinformation of China (NASG))

409x154mm (300 x 300 DPI)

STROBE Statement—Checklist of items that should be included in reports of *cross-sectional studies*

|                              | Item No | Recommendation                                                                                                                                                                                               | Page No |
|------------------------------|---------|--------------------------------------------------------------------------------------------------------------------------------------------------------------------------------------------------------------|---------|
| <b>Title and abstract</b>    | 1       | (a) Indicate the study's design with a commonly used term in the title or the abstract                                                                                                                       | 1       |
|                              |         | (b) Provide in the abstract an informative and balanced summary of what was done and what was found                                                                                                          | 1       |
| <b>Introduction</b>          |         |                                                                                                                                                                                                              |         |
| Background/rationale         | 2       | Explain the scientific background and rationale for the investigation being reported                                                                                                                         | 2       |
| Objectives                   | 3       | State specific objectives, including any prespecified hypotheses                                                                                                                                             | 4       |
| <b>Methods</b>               |         |                                                                                                                                                                                                              |         |
| Study design                 | 4       | Present key elements of study design early in the paper                                                                                                                                                      | 4       |
| Setting                      | 5       | Describe the setting, locations, and relevant dates, including periods of recruitment, exposure, follow-up, and data collection                                                                              | 5       |
| Participants                 | 6       | (a) Give the eligibility criteria, and the sources and methods of selection of participants                                                                                                                  | 5       |
| Variables                    | 7       | Clearly define all outcomes, exposures, predictors, potential confounders, and effect modifiers. Give diagnostic criteria, if applicable                                                                     | 5       |
| Data sources/<br>measurement | 8*      | For each variable of interest, give sources of data and details of methods of assessment (measurement). Describe comparability of assessment methods if there is more than one group                         | 4       |
| Bias                         | 9       | Describe any efforts to address potential sources of bias                                                                                                                                                    |         |
| Study size                   | 10      | Explain how the study size was arrived at                                                                                                                                                                    | 7       |
| Quantitative variables       | 11      | Explain how quantitative variables were handled in the analyses. If applicable, describe which groupings were chosen and why                                                                                 | 5       |
| Statistical methods          | 12      | (a) Describe all statistical methods, including those used to control for confounding                                                                                                                        | 6-7     |
|                              |         | (b) Describe any methods used to examine subgroups and interactions                                                                                                                                          | 6-7     |
|                              |         | (c) Explain how missing data were addressed                                                                                                                                                                  |         |
|                              |         | (d) If applicable, describe analytical methods taking account of sampling strategy                                                                                                                           |         |
|                              |         | (e) Describe any sensitivity analyses                                                                                                                                                                        |         |
| <b>Results</b>               |         |                                                                                                                                                                                                              |         |
| Participants                 | 13*     | (a) Report numbers of individuals at each stage of study—eg numbers potentially eligible, examined for eligibility, confirmed eligible, included in the study, completing follow-up, and analysed            | 7       |
|                              |         | (b) Give reasons for non-participation at each stage                                                                                                                                                         |         |
|                              |         | (c) Consider use of a flow diagram                                                                                                                                                                           |         |
| Descriptive data             | 14*     | (a) Give characteristics of study participants (eg demographic, clinical, social) and information on exposures and potential confounders                                                                     | 7-8     |
|                              |         | (b) Indicate number of participants with missing data for each variable of interest                                                                                                                          |         |
| Outcome data                 | 15*     | Report numbers of outcome events or summary measures                                                                                                                                                         | 8-9     |
| Main results                 | 16      | (a) Give unadjusted estimates and, if applicable, confounder-adjusted estimates and their precision (eg, 95% confidence interval). Make clear which confounders were adjusted for and why they were included | 8-9     |

|                          |    |                                                                                                                                                                            |       |
|--------------------------|----|----------------------------------------------------------------------------------------------------------------------------------------------------------------------------|-------|
|                          |    | (b) Report category boundaries when continuous variables were categorized                                                                                                  | 8-9   |
|                          |    | (c) If relevant, consider translating estimates of relative risk into absolute risk for a meaningful time period                                                           | 8-9   |
| Other analyses           | 17 | Report other analyses done—eg analyses of subgroups and interactions, and sensitivity analyses                                                                             | 9     |
| <b>Discussion</b>        |    |                                                                                                                                                                            |       |
| Key results              | 18 | Summarise key results with reference to study objectives                                                                                                                   | 9-10  |
| Limitations              | 19 | Discuss limitations of the study, taking into account sources of potential bias or imprecision. Discuss both direction and magnitude of any potential bias                 | 13    |
| Interpretation           | 20 | Give a cautious overall interpretation of results considering objectives, limitations, multiplicity of analyses, results from similar studies, and other relevant evidence | 10-12 |
| Generalisability         | 21 | Discuss the generalisability (external validity) of the study results                                                                                                      |       |
| <b>Other information</b> |    |                                                                                                                                                                            |       |
| Funding                  | 22 | Give the source of funding and the role of the funders for the present study and, if applicable, for the original study on which the present article is based              | 17    |

\*Give information separately for exposed and unexposed groups.

**Note:** An Explanation and Elaboration article discusses each checklist item and gives methodological background and published examples of transparent reporting. The STROBE checklist is best used in conjunction with this article (freely available on the Web sites of PLoS Medicine at <http://www.plosmedicine.org/>, Annals of Internal Medicine at <http://www.annals.org/>, and Epidemiology at <http://www.epidem.com/>). Information on the STROBE Initiative is available at [www.strobe-statement.org](http://www.strobe-statement.org).
